# Supplementary material
Source: PubMed Central journal article supplement (PMC8493438)
Supplement: jama-e2115187-s001.pdf [file jama-e2115187-s001.pdf]

## Supplemental Online Content

He J, Zhu Z, Bundy JD, Dorans KS, Chen J, Hamm LL. Trends in cardiovascular risk factors in US adults by race and ethnicity and socioeconomic status, 1999-2018. *JAMA*. Published October 5, 2021. doi:10.1001/jama.2021.15187

**eTable 1.** Age-Sex-Adjusted and Age-Adjusted Means or Percentage (95% Confidence Intervals) of Cardiovascular Risk Factors in US Adults Aged  $\geq 20$  Years, NHANES 1999-2018

**eTable 2.** Sex-Adjusted Mean and Prevalence (95% Confidence Intervals) of Cardiovascular Risk Factors by Age Groups, NHANES 1999-2018

**eTable 3.** Age-Sex-Adjusted or Age-Adjusted Prevalences (95% Confidence Intervals) of Elevated Cardiovascular Risk Factors in US Adults Aged  $\geq 20$  Years, NHANES 1999-2018

**eTable 4.** Age-Sex-Adjusted and Age-Adjusted Prevalences (95% Confidence Intervals) of Self-Reported History of Cardiovascular Disease and Use of Medications in US Adults Aged  $\geq 20$  Years, NHANES 1999-2018

**eTable 5.** Age-Sex-Adjusted Mean (95% Confidence Intervals) Cardiovascular Risk Factors Overall and by Race and Socioeconomic Status, NHANES 1999-2018

**eTable 6.** Age-Sex-Adjusted Prevalences (95% Confidence Intervals) of Elevated Cardiovascular Risk Factors Overall and by Race and Socioeconomic Status, NHANES 1999-2018

**eTable 7.** Racial and Ethnic Differences in Proportion of Elevated Cardiovascular Risk Factors Adjusting for Social Determinants of Health During 1999-2008 and 2009-2018

This supplemental material has been provided by the authors to give readers additional information about their work.

**eTable 1. Age-Sex-Adjusted and Age-Adjusted Means or Percentage (95% Confidence Intervals) of Cardiovascular Risk Factors in the US Adults Aged ≥20 Years, NHANES 1999-2018<sup>a</sup>**

| Cardiovascular risk factors          | 1999-2000<br>(n=4158)  | 2001-2002<br>(n=4685)  | 2003-2004<br>(n=4486)  | 2005-2006<br>(n=4410)  | 2007-2008<br>(n=5619)  | 2009-2010<br>(n=5960)  | 2011-2012<br>(n=5239)  | 2013-2014<br>(n=5484)  | 2015-2016<br>(n=5360)  | 2017-2018<br>(n=5170)  | P for linear trend | P for non-linear trend <sup>b</sup> |
|--------------------------------------|------------------------|------------------------|------------------------|------------------------|------------------------|------------------------|------------------------|------------------------|------------------------|------------------------|--------------------|-------------------------------------|
| <b>Body mass index</b>               |                        |                        |                        |                        |                        |                        |                        |                        |                        |                        |                    |                                     |
| Overall                              | 28.0<br>(27.5-28.5)    | 28.0<br>(27.7-28.3)    | 28.2<br>(27.8-28.5)    | 28.5<br>(28.0-29.0)    | 28.5<br>(28.2-28.9)    | 28.7<br>(28.4-28.9)    | 28.7<br>(28.2-29.1)    | 29.2<br>(28.8-29.6)    | 29.4<br>(28.8-29.9)    | 29.8<br>(29.2-30.4)    | <.001              |                                     |
| Men <sup>c</sup>                     | 27.8<br>(27.3-28.3)    | 27.9<br>(27.6-28.2)    | 28.1<br>(27.8-28.4)    | 28.6<br>(28.1-29.0)    | 28.5<br>(28.1-28.8)    | 28.7<br>(28.3-29.1)    | 28.5<br>(28.0-28.9)    | 28.8<br>(28.5-29.2)    | 29.1<br>(28.5-29.7)    | 29.7<br>(29.1-30.3)    | <.001              |                                     |
| Women <sup>c</sup>                   | 28.3<br>(27.7-28.9)    | 28.1<br>(27.7-28.5)    | 28.2<br>(27.6-28.8)    | 28.4<br>(27.8-29.0)    | 28.6<br>(28.2-29.1)    | 28.7<br>(28.4-28.9)    | 28.9<br>(28.4-29.4)    | 29.5<br>(28.9-30.1)    | 29.6<br>(29.0-30.3)    | 29.9<br>(29.1-30.7)    | <.001              |                                     |
| Non-cardiovascular disease           | 28.0<br>(27.5-28.5)    | 27.9<br>(27.6-28.2)    | 28.1<br>(27.7-28.4)    | 28.4<br>(27.9-28.8)    | 28.4<br>(28.1-28.8)    | 28.5<br>(28.2-28.8)    | 28.6<br>(28.1-29.0)    | 29.0<br>(28.6-29.4)    | 29.2<br>(28.6-29.8)    | 29.7<br>(29.1-30.3)    | <.001              |                                     |
| History of cardiovascular disease    | 30.6<br>(28.9-32.4)    | 29.9<br>(28.3-31.5)    | 29.9<br>(27.6-32.2)    | 31.1<br>(25.7-36.5)    | 30.9<br>(28.6-33.1)    | 31.1<br>(29.6-32.7)    | 30.2<br>(29.1-31.3)    | 31.7<br>(29.0-34.5)    | 31.9<br>(29.2-34.6)    | 33.8<br>(31.2-36.5)    | <.001              |                                     |
| <b>Systolic blood pressure, mmHg</b> |                        |                        |                        |                        |                        |                        |                        |                        |                        |                        |                    |                                     |
| Overall                              | 123.5<br>(122.2-124.8) | 123.0<br>(122.2-123.9) | 122.6<br>(121.4-123.8) | 122.2<br>(121.2-123.3) | 121.7<br>(121.0-122.4) | 120.5<br>(119.6-121.3) | 121.3<br>(120.0-122.6) | 121.2<br>(120.6-121.9) | 122.8<br>(122.0-123.7) | 122.8<br>(121.7-123.8) |                    | <.001                               |
| Men <sup>c</sup>                     | 124.9<br>(123.4-126.4) | 123.6<br>(122.4-124.8) | 124.1<br>(122.7-125.4) | 124.0<br>(122.9-125.1) | 123.7<br>(122.9-124.6) | 122.9<br>(122.2-123.5) | 123.2<br>(121.8-124.6) | 123.4<br>(122.3-124.4) | 124.7<br>(123.5-125.9) | 124.6<br>(123.4-125.8) |                    | .01                                 |
| Women <sup>c</sup>                   | 122.1<br>(120.7-123.5) | 122.4<br>(121.4-123.4) | 121.3<br>(120.0-122.6) | 120.5<br>(119.4-121.7) | 119.8<br>(119.0-120.6) | 118.1<br>(116.9-119.4) | 119.4<br>(118.0-120.8) | 119.3<br>(118.6-119.9) | 121.0<br>(120.0-122.0) | 121.1<br>(119.9-122.2) |                    | <.001                               |
| Non-cardiovascular disease           | 123.5<br>(122.1-124.7) | 123.0<br>(122.1-123.9) | 124.3<br>(121.5-127.1) | 122.2<br>(121.1-123.3) | 121.6<br>(121.0-122.3) | 120.5<br>(119.6-121.4) | 121.0<br>(119.7-122.4) | 121.4<br>(120.7-122.0) | 122.8<br>(121.8-123.7) | 122.5<br>(121.6-123.5) |                    | <.001                               |

| <b>Cardiovascular risk factors</b> | <b>1999-2000<br/>(n=4158)</b> | <b>2001-2002<br/>(n=4685)</b> | <b>2003-2004<br/>(n=4486)</b> | <b>2005-2006<br/>(n=4410)</b> | <b>2007-2008<br/>(n=5619)</b> | <b>2009-2010<br/>(n=5960)</b> | <b>2011-2012<br/>(n=5239)</b> | <b>2013-2014<br/>(n=5484)</b> | <b>2015-2016<br/>(n=5360)</b> | <b>2017-2018<br/>(n=5170)</b> | <b>P for linear trend</b> | <b>P for non-linear trend<sup>b</sup></b> |
|------------------------------------|-------------------------------|-------------------------------|-------------------------------|-------------------------------|-------------------------------|-------------------------------|-------------------------------|-------------------------------|-------------------------------|-------------------------------|---------------------------|-------------------------------------------|
| History of cardiovascular disease  | 119.1<br>(115.1-123.1)        | 124.3<br>(121.5-127.1)        | 123.5<br>(122.1-125.0)        | 121.5<br>(119.4-123.6)        | 122.0<br>(119.1-124.8)        | 123.1<br>(117.9-128.2)        | 124.0<br>(119.1-129.0)        | 123.3<br>(120.9-125.7)        | 126.0<br>(121.9-130.1)        | 124.9<br>(121.0-128.8)        |                           | .002                                      |
| <b>Hemoglobin A1c, %</b>           |                               |                               |                               |                               |                               |                               |                               |                               |                               |                               |                           |                                           |
| Overall                            | 5.42<br>(5.33-5.51)           | 5.49<br>(5.45-5.54)           | 5.49<br>(5.46-5.53)           | 5.44<br>(5.40-5.49)           | 5.58<br>(5.52-5.63)           | 5.61<br>(5.58-5.65)           | 5.63<br>(5.58-5.67)           | 5.59<br>(5.56-5.63)           | 5.65<br>(5.58-5.71)           | 5.66<br>(5.62-5.69)           | <.001                     |                                           |
| Men <sup>c</sup>                   | 5.46<br>(5.37-5.56)           | 5.55<br>(5.48-5.62)           | 5.55<br>(5.50-5.59)           | 5.47<br>(5.42-5.52)           | 5.61<br>(5.55-5.67)           | 5.66<br>(5.61-5.70)           | 5.66<br>(5.60-5.73)           | 5.63<br>(5.58-5.68)           | 5.70<br>(5.61-5.79)           | 5.69<br>(5.64-5.75)           | <.001                     |                                           |
| Women <sup>c</sup>                 | 5.39<br>(5.29-5.49)           | 5.45<br>(5.40-5.50)           | 5.45<br>(5.41-5.49)           | 5.43<br>(5.39-5.48)           | 5.56<br>(5.49-5.62)           | 5.58<br>(5.54-5.61)           | 5.60<br>(5.56-5.65)           | 5.57<br>(5.54-5.61)           | 5.61<br>(5.55-5.66)           | 5.63<br>(5.59-5.68)           | <.001                     |                                           |
| Non-cardiovascular disease         | 5.39<br>(5.29-5.49)           | 5.48<br>(5.43-5.53)           | 5.47<br>(5.44-5.51)           | 5.42<br>(5.38-5.47)           | 5.55<br>(5.50-5.60)           | 5.59<br>(5.56-5.63)           | 5.60<br>(5.56-5.64)           | 5.57<br>(5.54-5.60)           | 5.62<br>(5.55-5.69)           | 5.63<br>(5.59-5.66)           | <.001                     |                                           |
| History of cardiovascular disease  | 5.60<br>(5.46-5.75)           | 5.83<br>(5.39-6.26)           | 5.67<br>(5.55-5.78)           | 5.58<br>(5.49-5.67)           | 5.90<br>(5.72-6.09)           | 5.82<br>(5.69-5.94)           | 6.00<br>(5.83-6.17)           | 5.97<br>(5.76-6.17)           | 6.09<br>(5.65-6.52)           | 6.02<br>(5.69-6.35)           | <.001                     |                                           |
| <b>Total cholesterol, mg/dL</b>    |                               |                               |                               |                               |                               |                               |                               |                               |                               |                               |                           |                                           |
| Overall                            | 203.3<br>(200.9-205.8)        | 201.6<br>(199.1-204.0)        | 200.9<br>(199.5-202.3)        | 197.8<br>(196.2-199.4)        | 196.5<br>(194.7-198.3)        | 195.3<br>(193.3-197.4)        | 194.3<br>(192.4-196.2)        | 188.9<br>(187.3-190.6)        | 191.8<br>(189.2-194.3)        | 188.5<br>(185.2-191.9)        | <.001                     |                                           |
| Men <sup>c</sup>                   | 203.0<br>(200.1-205.9)        | 201.1<br>(197.0-205.3)        | 200.3<br>(198.8-201.8)        | 195.4<br>(193.3-197.5)        | 194.1<br>(191.5-196.6)        | 193.8<br>(191.4-196.2)        | 190.7<br>(188.2-193.2)        | 186.1<br>(183.4-188.7)        | 189.7<br>(186.7-192.7)        | 185.6<br>(181.6-189.6)        | <.001                     |                                           |
| Women <sup>c</sup>                 | 203.5<br>(200.7-206.2)        | 201.7<br>(199.5-203.8)        | 201.2<br>(198.9-203.6)        | 199.7<br>(197.8-201.5)        | 198.3<br>(196.0-200.6)        | 196.5<br>(193.9-199.0)        | 197.4<br>(195.4-199.3)        | 191.3<br>(189.8-192.9)        | 193.3<br>(190.5-196.1)        | 190.9<br>(187.4-194.4)        | <.001                     |                                           |
| Non-cardiovascular disease         | 204.0<br>(201.2-206.9)        | 202.3<br>(199.8-204.9)        | 201.5<br>(200.0-203.0)        | 199.3<br>(197.3-201.2)        | 197.7<br>(195.9-199.5)        | 196.8<br>(194.7-198.9)        | 195.5<br>(193.5-197.4)        | 190.2<br>(188.5-191.9)        | 193.2<br>(190.7-195.8)        | 189.7<br>(186.3-193.2)        | <.001                     |                                           |

| Cardiovascular risk factors                                                  | 1999-2000<br>(n=4158)  | 2001-2002<br>(n=4685)  | 2003-2004<br>(n=4486)  | 2005-2006<br>(n=4410)  | 2007-2008<br>(n=5619)  | 2009-2010<br>(n=5960)  | 2011-2012<br>(n=5239)  | 2013-2014<br>(n=5484)  | 2015-2016<br>(n=5360)  | 2017-2018<br>(n=5170)  | P for linear trend | P for non-linear trend <sup>b</sup> |
|------------------------------------------------------------------------------|------------------------|------------------------|------------------------|------------------------|------------------------|------------------------|------------------------|------------------------|------------------------|------------------------|--------------------|-------------------------------------|
| History of cardiovascular disease                                            | 193.7<br>(188.3-199.0) | 197.5<br>(187.0-207.9) | 198.7<br>(189.6-207.9) | 184.1<br>(167.4-200.8) | 189.6<br>(183.8-195.5) | 181.2<br>(171.2-191.1) | 185.2<br>(180.1-190.2) | 187.8<br>(178.3-197.4) | 180.4<br>(172.0-188.8) | 182.9<br>(172.2-193.5) | <.001              |                                     |
| <b>Current smoking, %</b>                                                    |                        |                        |                        |                        |                        |                        |                        |                        |                        |                        |                    |                                     |
| Overall                                                                      | 24.8<br>(21.8-27.7)    | 25.1<br>(22.6-27.6)    | 26.2<br>(23.9-28.4)    | 24.4<br>(21.6-27.3)    | 23.4<br>(20.4-26.3)    | 20.9<br>(19.0-22.7)    | 20.3<br>(17.8-22.9)    | 20.8<br>(18.5-23.1)    | 19.1<br>(17.0-21.2)    | 18.1<br>(15.4-20.8)    | <.001              |                                     |
| Men <sup>c</sup>                                                             | 27.3<br>(23.8-30.8)    | 26.9<br>(24.1-29.8)    | 28.8<br>(26.1-31.4)    | 27.3<br>(23.6-31.1)    | 26.0<br>(22.7-29.4)    | 22.3<br>(20.1-24.4)    | 24.0<br>(20.6-27.3)    | 21.4<br>(19.0-23.8)    | 21.4<br>(18.5-24.3)    | 19.8<br>(16.8-22.8)    | <.001              |                                     |
| Women <sup>c</sup>                                                           | 22.2<br>(18.9-25.4)    | 23.1<br>(20.2-25.9)    | 23.5<br>(21.0-26.0)    | 21.4<br>(18.4-24.4)    | 20.6<br>(17.5-23.6)    | 19.5<br>(17.1-21.8)    | 17.0<br>(14.1-19.9)    | 20.1<br>(17.1-23.0)    | 17.0<br>(15.0-18.9)    | 16.5<br>(13.4-19.5)    | <.001              |                                     |
| Non-cardiovascular disease                                                   | 24.5<br>(21.7-27.4)    | 24.8<br>(22.4-27.1)    | 25.9<br>(23.5-28.3)    | 24.2<br>(21.3-27.1)    | 22.8<br>(19.9-25.7)    | 20.5<br>(18.6-22.4)    | 19.7<br>(17.4-22.0)    | 20.1<br>(17.6-22.6)    | 18.2<br>(16.0-20.4)    | 17.6<br>(15.1-20.1)    | <.001              |                                     |
| History of cardiovascular disease                                            | 23.5<br>(12.2-34.9)    | 36.1<br>(27.6-44.5)    | 39.8<br>(25.2-54.4)    | 24.7<br>(13.5-35.9)    | 38.9<br>(29.2-48.7)    | 33.8<br>(23.8-43.7)    | 36.2<br>(24.9-47.5)    | 38.7<br>(24.4-53.0)    | 38.6<br>(23.3-54.0)    | 31.1<br>(21.3-41.0)    | .25                |                                     |
| <b>10-year risk of atherosclerotic cardiovascular disease, %<sup>d</sup></b> |                        |                        |                        |                        |                        |                        |                        |                        |                        |                        |                    |                                     |
| Overall                                                                      | 7.6 (6.9-8.2)          | 7.3 (6.9-7.6)          | 7.0 (6.5-7.5)          | 6.9 (6.4-7.4)          | 6.9 (6.5-7.3)          | 6.7 (6.4-7.0)          | 6.5 (6.1-6.8)          | 6.5 (6.1-6.8)          | 6.6 (6.1-7.1)          | 6.6 (6.2-6.9)          | <.001              |                                     |
| Men <sup>c</sup>                                                             | 8.7 (7.9-9.4)          | 8.5 (8.1-8.9)          | 8.4 (7.8-9.1)          | 7.9 (7.4-8.3)          | 8.3 (7.9-8.7)          | 8.0 (7.6-8.4)          | 8.2 (7.6-8.7)          | 7.8 (7.5-8.2)          | 8.3 (7.6-9.0)          | 8.1 (7.8-8.5)          | .10                |                                     |
| Women <sup>c</sup>                                                           | 6.9 (6.0-7.7)          | 6.4 (6.0-6.8)          | 6.0 (5.2-6.7)          | 6.2 (5.5-6.8)          | 5.9 (5.4-6.3)          | 5.7 (5.3-6.0)          | 5.1 (4.8-5.4)          | 5.5 (5.0-6.1)          | 5.4 (4.9-5.8)          | 5.5 (4.9-6.0)          | <.001              |                                     |

<sup>a</sup> Age- and sex-adjusted for the entire US population by the direct standardization method to the US 2000 Census population using the following age and sex categories: 20-39 male, 40-59 male, 60 years or older male, 20-39 female, 40-59 female, and 60 years or older female.

<sup>b</sup> Nonlinear trend was tested first by adding a quadratic term into the regression model. If not significant, linear trend was tested.

<sup>c</sup> Age-adjusted for the entire US population by the direct standardization method to the US 2000 Census population using three age categories: 20-39, 40-59, and 60 years or older.

<sup>d</sup> The 10-year risk of atherosclerotic cardiovascular disease (ASCVD) was calculated using the ACC/AHA Pooled Risk Equations.

**eTable 2. Sex-Adjusted Mean and Prevalence (95% Confidence Intervals) of Cardiovascular Risk Factors by Age Groups, NHANES 1999-2018**

| Cardiovascular risk factors/<br>age groups          | 1999-<br>2000<br>(n=4158)  | 2001-<br>2002<br>(n=4685)  | 2003-<br>2004<br>(n=4486)  | 2005-<br>2006<br>(n=4410)  | 2007-<br>2008<br>(n=5619)  | 2009-<br>2010<br>(n=5960)  | 2011-<br>2012<br>(n=5239)  | 2013-<br>2014<br>(n=5484)  | 2015-<br>2016<br>(n=5360)  | 2017-<br>2018<br>(n=5170)  | P for<br>linear<br>trend | P for<br>non-<br>linear<br>trend <sup>a</sup> |
|-----------------------------------------------------|----------------------------|----------------------------|----------------------------|----------------------------|----------------------------|----------------------------|----------------------------|----------------------------|----------------------------|----------------------------|--------------------------|-----------------------------------------------|
| <b>Body mass index, mean (95% CI)</b>               |                            |                            |                            |                            |                            |                            |                            |                            |                            |                            |                          |                                               |
| 20-39 years                                         | 27.2<br>(26.8-<br>27.8)    | 27.2<br>(26.7-<br>27.6)    | 27.4<br>(26.9-<br>27.8)    | 27.6<br>(27.0-<br>28.2)    | 28.0<br>(27.4-<br>28.6)    | 28.0<br>(27.5-<br>28.5)    | 27.9<br>(27.3-<br>28.5)    | 28.7<br>(28.0-<br>29.3)    | 28.8<br>(28.1-<br>29.5)    | 29.3<br>(28.4-<br>30.2)    | <.001                    |                                               |
| 40-59 years                                         | 28.6<br>(27.8-<br>29.5)    | 28.7<br>(28.1-<br>29.3)    | 29.0<br>(28.5-<br>29.5)    | 29.5<br>(28.8-<br>30.2)    | 29.0<br>(28.6-<br>29.5)    | 29.0<br>(28.6-<br>29.4)    | 29.5<br>(29.1-<br>30.0)    | 29.7<br>(29.0-<br>30.3)    | 29.9<br>(29.1-<br>30.7)    | 30.5<br>(29.8-<br>31.2)    | <.001                    |                                               |
| ≥60 years                                           | 28.2<br>(27.9-<br>28.6)    | 28.4<br>(27.9-<br>28.8)    | 28.2<br>(27.9-<br>28.6)    | 28.5<br>(28.1-<br>28.8)    | 28.7<br>(28.3-<br>29.0)    | 29.3<br>(28.9-<br>29.7)    | 28.7<br>(28.0-<br>29.4)    | 29.2<br>(28.7-<br>29.7)    | 29.5<br>(28.9-<br>30.2)    | 29.6<br>(29.1-<br>30.1)    | <.001                    |                                               |
| P for group<br>difference                           | <.001                      | <.001                      | <.001                      | <.001                      | <.001                      | <.001                      | <.001                      | <.001                      | <.001                      | <.001                      | .30                      |                                               |
| <b>Obesity, %</b>                                   |                            |                            |                            |                            |                            |                            |                            |                            |                            |                            |                          |                                               |
| 20-39 years                                         | 25.5<br>(22.3-<br>28.8)    | 25.5<br>(22.6-<br>28.4)    | 28.4<br>(25.3-<br>31.5)    | 28.6<br>(24.4-<br>32.8)    | 30.7<br>(26.3-<br>35.1)    | 32.6<br>(28.9-<br>36.3)    | 30.5<br>(26.6-<br>34.4)    | 34.5<br>(31.2-<br>37.7)    | 35.8<br>(31.8-<br>39.8)    | 40.0<br>(34.4-<br>45.6)    | <.001                    |                                               |
| 40-59 years                                         | 33.3<br>(26.8-<br>39.7)    | 33.4<br>(30.2-<br>36.6)    | 36.3<br>(32.4-<br>40.3)    | 40.0<br>(35.4-<br>44.6)    | 36.0<br>(32.5-<br>39.6)    | 36.5<br>(34.3-<br>38.6)    | 39.5<br>(36.0-<br>42.9)    | 41.2<br>(36.8-<br>45.6)    | 42.8<br>(37.4-<br>48.3)    | 44.8<br>(40.8-<br>48.9)    | <.001                    |                                               |
| ≥60 years                                           | 33.3<br>(29.8-<br>36.9)    | 31.8<br>(28.2-<br>35.3)    | 30.9<br>(28.1-<br>33.7)    | 33.2<br>(30.8-<br>35.6)    | 34.9<br>(32.7-<br>37.1)    | 39.4<br>(36.4-<br>42.5)    | 35.4<br>(31.2-<br>39.6)    | 38.5<br>(35.0-<br>42.0)    | 41.0<br>(36.8-<br>45.1)    | 42.8<br>(37.5-<br>48.0)    | <.001                    |                                               |
| P for group<br>difference                           | <.001                      | <.001                      | <.001                      | <.001                      | <.001                      | <.001                      | <.001                      | <.001                      | <.001                      | <.001                      | .25                      |                                               |
| <b>Systolic blood pressure, mmHg, mean (95% CI)</b> |                            |                            |                            |                            |                            |                            |                            |                            |                            |                            |                          |                                               |
| 20-39 years                                         | 115.2<br>(113.6-<br>116.9) | 114.3<br>(113.6-<br>115.0) | 114.7<br>(113.9-<br>115.6) | 115.3<br>(114.2-<br>116.4) | 115.2<br>(114.3-<br>116.1) | 114.6<br>(113.9-<br>115.3) | 114.7<br>(113.4-<br>116.0) | 115.2<br>(114.2-<br>116.2) | 116.6<br>(115.6-<br>117.5) | 115.8<br>(114.6-<br>117.0) | .05                      |                                               |

| <b>Cardiovascular risk factors/ age groups</b> | <b>1999-2000<br/>(n=4158)</b> | <b>2001-2002<br/>(n=4685)</b> | <b>2003-2004<br/>(n=4486)</b> | <b>2005-2006<br/>(n=4410)</b> | <b>2007-2008<br/>(n=5619)</b> | <b>2009-2010<br/>(n=5960)</b> | <b>2011-2012<br/>(n=5239)</b> | <b>2013-2014<br/>(n=5484)</b> | <b>2015-2016<br/>(n=5360)</b> | <b>2017-2018<br/>(n=5170)</b> | <b>P for linear trend</b> | <b>P for non-linear trend<sup>a</sup></b> |
|------------------------------------------------|-------------------------------|-------------------------------|-------------------------------|-------------------------------|-------------------------------|-------------------------------|-------------------------------|-------------------------------|-------------------------------|-------------------------------|---------------------------|-------------------------------------------|
| 40-59 years                                    | 122.7<br>(121.1-124.2)        | 122.9<br>(121.4-124.4)        | 123.4<br>(121.8-125.0)        | 122.9<br>(121.8-124.0)        | 121.9<br>(120.8-123.0)        | 120.5<br>(119.1-121.9)        | 121.9<br>(120.3-123.5)        | 121.5<br>(120.4-122.7)        | 124.0<br>(122.6-125.4)        | 124.0<br>(122.6-125.4)        |                           | <.001                                     |
| ≥60 years                                      | 139.7<br>(137.6-141.8)        | 138.9<br>(136.9-140.8)        | 135.7<br>(133.0-138.5)        | 133.9<br>(131.7-136.1)        | 133.1<br>(131.4-134.7)        | 131.1<br>(129.7-132.5)        | 132.0<br>(130.3-133.7)        | 131.7<br>(130.2-133.2)        | 132.2<br>(130.2-134.2)        | 133.3<br>(131.5-135.0)        |                           | <.001                                     |
| P for group difference                         | <0.001                        | <0.001                        | <0.001                        | <0.001                        | <0.001                        | <0.001                        | <0.001                        | <0.001                        | <0.001                        | <0.001                        |                           | <.001                                     |
| <b>Hypertension, %</b>                         |                               |                               |                               |                               |                               |                               |                               |                               |                               |                               |                           |                                           |
| 20-39 years                                    | 25.0<br>(20.5-29.5)           | 25.3<br>(22.0-28.6)           | 20.1<br>(17.7-22.6)           | 20.0<br>(16.3-23.6)           | 19.9<br>(16.6-23.3)           | 21.3<br>(19.3-23.3)           | 21.7<br>(18.0-25.4)           | 19.1<br>(16.5-21.6)           | 22.3<br>(18.5-26.1)           | 24.4<br>(21.8-27.1)           |                           | <.001                                     |
| 40-59 years                                    | 52.8<br>(49.0-56.7)           | 49.9<br>(46.2-53.7)           | 52.8<br>(46.5-59.0)           | 52.2<br>(48.2-56.3)           | 49.7<br>(46.7-52.6)           | 46.3<br>(40.5-52.1)           | 51.1<br>(49.3-52.9)           | 48.7<br>(45.0-52.4)           | 51.8<br>(48.1-55.5)           | 54.2<br>(48.9-59.5)           |                           | .04                                       |
| ≥60 years                                      | 78.8<br>(72.8-84.8)           | 79.1<br>(75.6-82.5)           | 76.4<br>(72.4-80.3)           | 75.3<br>(71.0-79.5)           | 77.6<br>(74.6-80.5)           | 76.3<br>(73.1-79.4)           | 75.7<br>(72.5-78.8)           | 76.3<br>(73.1-79.6)           | 72.2<br>(67.2-77.3)           | 74.0<br>(70.7-77.4)           | .02                       |                                           |
| P for group difference                         | <.001                         | <.001                         | <.001                         | <.001                         | <.001                         | <.001                         | <.001                         | <.001                         | <.001                         | <.001                         |                           | .02                                       |
| <b>Hemoglobin A1c, %, mean (95% CI)</b>        |                               |                               |                               |                               |                               |                               |                               |                               |                               |                               |                           |                                           |
| 20-39 years                                    | 5.12<br>(5.03-5.21)           | 5.26<br>(5.21-5.32)           | 5.25<br>(5.21-5.28)           | 5.18<br>(5.13-5.23)           | 5.28<br>(5.24-5.33)           | 5.33<br>(5.29-5.36)           | 5.34<br>(5.29-5.40)           | 5.26<br>(5.23-5.29)           | 5.33<br>(5.28-5.38)           | 5.34<br>(5.29-5.38)           | <.001                     |                                           |
| 40-59 years                                    | 5.50<br>(5.38-5.63)           | 5.54<br>(5.48-5.60)           | 5.59<br>(5.54-5.65)           | 5.53<br>(5.47-5.59)           | 5.67<br>(5.61-5.73)           | 5.70<br>(5.65-5.76)           | 5.73<br>(5.65-5.81)           | 5.73<br>(5.66-5.80)           | 5.79<br>(5.67-5.90)           | 5.79<br>(5.72-5.86)           | <.001                     |                                           |
| ≥60 years                                      | 5.82<br>(5.70-5.94)           | 5.83<br>(5.77-5.89)           | 5.78<br>(5.73-5.84)           | 5.78<br>(5.71-5.84)           | 5.96<br>(5.84-6.08)           | 5.97<br>(5.91-6.03)           | 5.97<br>(5.88-6.06)           | 5.96<br>(5.93-6.00)           | 5.98<br>(5.90-6.06)           | 6.01<br>(5.95-6.07)           | <.001                     |                                           |
| P for group difference                         | <.001                         | <.001                         | <.001                         | <.001                         | <.001                         | <.001                         | <.001                         | <.001                         | <.001                         | <.001                         | <.001                     |                                           |

| Cardiovascular risk factors/<br>age groups     | 1999-<br>2000<br>(n=4158)  | 2001-<br>2002<br>(n=4685)  | 2003-<br>2004<br>(n=4486)  | 2005-<br>2006<br>(n=4410)  | 2007-<br>2008<br>(n=5619)  | 2009-<br>2010<br>(n=5960)  | 2011-<br>2012<br>(n=5239)  | 2013-<br>2014<br>(n=5484)  | 2015-<br>2016<br>(n=5360)  | 2017-<br>2018<br>(n=5170)  | P for<br>linear<br>trend | P for<br>non-<br>linear<br>trend <sup>a</sup> |
|------------------------------------------------|----------------------------|----------------------------|----------------------------|----------------------------|----------------------------|----------------------------|----------------------------|----------------------------|----------------------------|----------------------------|--------------------------|-----------------------------------------------|
| <b>Diabetes, %</b>                             |                            |                            |                            |                            |                            |                            |                            |                            |                            |                            |                          |                                               |
| 20-39 years                                    | 1.7 (0.6-<br>2.8)          | 2.4 (0.9-<br>3.9)          | 2.4 (1.3-<br>3.5)          | 2.5 (1.7-<br>3.2)          | 3.1 (2.4-<br>3.8)          | 2.6 (1.9-<br>3.3)          | 3.0 (1.7-<br>4.3)          | 2.6 (1.9-<br>3.2)          | 3.7 (2.7-<br>4.7)          | 3.3 (2.3-<br>4.3)          | .009                     |                                               |
| 40-59 years                                    | 8.9 (6.7-<br>11.0)         | 8.9 (7.0-<br>10.9)         | 10.2<br>(8.2-<br>12.1)     | 9.5 (7.3-<br>11.7)         | 12.1<br>(10.3-<br>13.8)    | 10.8<br>(8.5-<br>13.1)     | 12.4<br>(9.3-<br>15.5)     | 13.2<br>(10.6-<br>15.8)    | 14.7<br>(11.4-<br>18.0)    | 14.9<br>(11.9-<br>17.9)    | <.001                    |                                               |
| ≥60 years                                      | 18.9<br>(16.1-<br>21.8)    | 19.7<br>(18.2-<br>21.1)    | 20.5<br>(18.0-<br>23.1)    | 20.3<br>(18.0-<br>22.6)    | 24.4<br>(20.1-<br>28.7)    | 25.3<br>(22.9-<br>27.7)    | 22.1<br>(19.5-<br>24.7)    | 23.5<br>(21.9-<br>25.2)    | 25.2<br>(21.7-<br>28.8)    | 26.2<br>(23.8-<br>28.6)    | <.001                    |                                               |
| P for group<br>difference                      | <.001                      | <.001                      | <.001                      | <.001                      | <.001                      | <.001                      | <.001                      | <.001                      | <.001                      | <.001                      | .20                      |                                               |
| <b>Total cholesterol, mg/dL, mean (95% CI)</b> |                            |                            |                            |                            |                            |                            |                            |                            |                            |                            |                          |                                               |
| 20-39 years                                    | 188.8<br>(186.2-<br>191.5) | 188.9<br>(186.0-<br>191.8) | 189.7<br>(187.4-<br>192.1) | 188.9<br>(186.4-<br>191.5) | 187.8<br>(185.0-<br>190.5) | 184.8<br>(182.8-<br>186.7) | 182.7<br>(180.2-<br>185.2) | 180.4<br>(176.8-<br>184.0) | 181.0<br>(179.0-<br>183.0) | 179.0<br>(175.2-<br>182.9) | <.001                    |                                               |
| 40-59 years                                    | 211.3<br>(207.0-<br>215.6) | 210.8<br>(206.8-<br>214.8) | 209.5<br>(206.0-<br>212.9) | 206.0<br>(203.1-<br>209.0) | 206.2<br>(203.0-<br>209.4) | 205.9<br>(202.0-<br>209.9) | 205.5<br>(202.7-<br>208.3) | 198.6<br>(196.8-<br>200.4) | 203.0<br>(198.3-<br>207.7) | 198.9<br>(195.1-<br>202.7) | <.001                    |                                               |
| ≥60 years                                      | 216.0<br>(214.0-<br>218.0) | 209.4<br>(206.2-<br>212.6) | 207.1<br>(204.6-<br>209.5) | 200.2<br>(197.4-<br>203.0) | 196.2<br>(193.8-<br>198.7) | 197.0<br>(193.3-<br>200.7) | 196.3<br>(192.7-<br>200.0) | 188.3<br>(185.2-<br>191.4) | 192.4<br>(189.6-<br>195.2) | 188.4<br>(183.4-<br>193.3) |                          | .001                                          |
| P for group<br>difference                      | <.001                      | <.001                      | <.001                      | <.001                      | <.001                      | <.001                      | <.001                      | <.001                      | <.001                      | <.001                      |                          | <.001                                         |
| <b>High total cholesterol, %</b>               |                            |                            |                            |                            |                            |                            |                            |                            |                            |                            |                          |                                               |
| 20-39 years                                    | 10.4<br>(5.0-<br>15.9)     | 15.1<br>(12.1-<br>18.0)    | 14.4<br>(12.1-<br>16.7)    | 15.1<br>(10.4-<br>19.7)    | 14.5<br>(11.3-<br>17.8)    | 12.5<br>(8.7-<br>16.4)     | 7.5 (5.9-<br>9.2)          | 8.6 (6.6-<br>10.7)         | 8.6 (7.0-<br>10.1)         | 8.2 (6.3-<br>10.0)         |                          | .02                                           |
| 40-59 years                                    | 31.6<br>(27.3-<br>36.0)    | 30.4<br>(27.1-<br>33.7)    | 33.7<br>(30.5-<br>37.0)    | 32.5<br>(27.5-<br>37.6)    | 34.6<br>(30.3-<br>38.9)    | 35.4<br>(33.2-<br>37.6)    | 33.6<br>(30.4-<br>36.7)    | 29.9<br>(25.8-<br>33.9)    | 29.8<br>(27.0-<br>32.5)    | 26.4<br>(23.2-<br>29.5)    |                          | <.001                                         |

| Cardiovascular risk factors/<br>age groups                                       | 1999-2000<br>(n=4158) | 2001-2002<br>(n=4685) | 2003-2004<br>(n=4486) | 2005-2006<br>(n=4410) | 2007-2008<br>(n=5619) | 2009-2010<br>(n=5960) | 2011-2012<br>(n=5239) | 2013-2014<br>(n=5484) | 2015-2016<br>(n=5360) | 2017-2018<br>(n=5170) | P for linear trend | P for non-linear trend <sup>a</sup> |
|----------------------------------------------------------------------------------|-----------------------|-----------------------|-----------------------|-----------------------|-----------------------|-----------------------|-----------------------|-----------------------|-----------------------|-----------------------|--------------------|-------------------------------------|
| ≥60 years                                                                        | 43.1<br>(40.5-45.8)   | 42.2<br>(39.6-44.8)   | 50.3<br>(47.9-52.8)   | 49.6<br>(47.0-52.2)   | 52.1<br>(49.8-54.5)   | 52.9<br>(49.2-56.6)   | 53.7<br>(50.2-57.2)   | 55.5<br>(52.0-59.1)   | 53.9<br>(51.4-56.3)   | 52.3<br>(48.7-55.9)   |                    | <.001                               |
| P for group difference                                                           | <.001                 | <.001                 | <.001                 | <.001                 | <.001                 | <.001                 | <.001                 | <.001                 | <.001                 | <.001                 |                    | <.001                               |
| <b>Current cigarette smoking, %</b>                                              |                       |                       |                       |                       |                       |                       |                       |                       |                       |                       |                    |                                     |
| 20-39 years                                                                      | 31.7<br>(26.9-36.5)   | 32.6<br>(27.8-37.4)   | 33.7<br>(30.4-37.1)   | 29.6<br>(25.6-33.6)   | 29.5<br>(25.5-33.5)   | 26.6<br>(23.2-30.1)   | 22.5<br>(18.3-26.7)   | 24.3<br>(21.4-27.2)   | 21.7<br>(19.2-24.3)   | 22.3<br>(17.7-26.8)   | <.001              |                                     |
| 40-59 years                                                                      | 24.5<br>(20.2-28.8)   | 25.0<br>(21.6-28.4)   | 27.1<br>(24.0-30.2)   | 25.6<br>(21.1-30.1)   | 24.8<br>(19.9-29.6)   | 21.4<br>(19.1-23.7)   | 23.5<br>(19.7-27.3)   | 23.3<br>(19.0-27.5)   | 20.5<br>(17.1-24.0)   | 18.1<br>(14.7-21.6)   | <.001              |                                     |
| ≥60 years                                                                        | 13.1<br>(10.5-15.8)   | 11.9<br>(9.6-14.3)    | 11.4<br>(9.7-13.1)    | 13.7<br>(10.8-16.6)   | 10.4<br>(8.4-12.5)    | 10.0<br>(8.4-11.7)    | 11.8<br>(9.7-13.8)    | 10.8<br>(8.7-12.8)    | 12.4<br>(9.6-15.2)    | 11.0<br>(9.2-12.8)    | .27                |                                     |
| P for group difference                                                           | <.001                 | <.001                 | <.001                 | <.001                 | <.001                 | <.001                 | <.001                 | <.001                 | <.001                 | <.001                 | .001               |                                     |
| <b>10-year atherosclerotic cardiovascular disease, mean (95% CI)<sup>b</sup></b> |                       |                       |                       |                       |                       |                       |                       |                       |                       |                       |                    |                                     |
| 20-39 years                                                                      | 1.8 (1.3-2.4)         | 1.5 (1.2-1.7)         | 1.4 (1.1-1.8)         | 1.3 (1.0-1.6)         | 1.6 (1.2-2.0)         | 1.2 (1.1-1.3)         | 1.0 (0.9-1.2)         | 1.3 (1.0-1.6)         | 1.1 (0.9-1.2)         | 1.1 (0.9-1.3)         | <.001              |                                     |
| 40-59 years                                                                      | 4.4 (3.8-5.0)         | 4.3 (3.9-4.6)         | 4.4 (3.9-4.8)         | 4.0 (3.7-4.4)         | 4.5 (4.1-4.8)         | 4.2 (3.9-4.4)         | 4.6 (3.8-5.3)         | 4.3 (4.0-4.6)         | 4.6 (4.1-5.1)         | 4.4 (4.1-4.8)         | .35                |                                     |
| ≥60 years                                                                        | 22.9<br>(20.8-25.0)   | 22.5<br>(21.0-24.0)   | 21.1<br>(19.3-22.9)   | 21.4<br>(19.8-23.1)   | 20.2<br>(19.1-21.3)   | 20.5<br>(19.4-21.5)   | 19.3<br>(18.2-20.4)   | 19.4<br>(18.3-20.5)   | 19.9<br>(17.8-22.1)   | 20.0<br>(18.6-21.4)   |                    | .04                                 |
| P for group difference                                                           | <.001                 | <.001                 | <.001                 | <.001                 | <.001                 | <.001                 | <.001                 | <.001                 | <.001                 | <.001                 |                    | .99                                 |

<sup>a</sup> Nonlinear trend was tested first by adding a quadratic term into the regression model. If not significant, linear trend was tested.

<sup>b</sup> The 10-year risk for atherosclerotic cardiovascular disease was estimated using the Pooled Cohort Equations.



**eTable 3. Age-Sex-Adjusted or Age-Adjusted Prevalences (95% Confidence Intervals) of Elevated Cardiovascular Risk Factors in US Adults Aged ≥20 Years, NHANES 1999-2018<sup>a</sup>**

| Elevated cardiovascular risk factors <sup>b</sup> | 1999-2000<br>(n=4158) | 2001-2002<br>(n=4685) | 2003-2004<br>(n=4486) | 2005-2006<br>(n=4410) | 2007-2008<br>(n=5619) | 2009-2010<br>(n=5960) | 2011-2012<br>(n=5239) | 2013-2014<br>(n=5484) | 2015-2016<br>(n=5360) | 2017-2018<br>(n=5170) | P for linear trend | P for non-linear trend <sup>c</sup> |
|---------------------------------------------------|-----------------------|-----------------------|-----------------------|-----------------------|-----------------------|-----------------------|-----------------------|-----------------------|-----------------------|-----------------------|--------------------|-------------------------------------|
| <b>Obesity, %</b>                                 |                       |                       |                       |                       |                       |                       |                       |                       |                       |                       |                    |                                     |
| Overall                                           | 30.2<br>(26.9-33.4)   | 29.9<br>(27.5-32.2)   | 31.9<br>(29.4-34.4)   | 33.9<br>(31.0-36.8)   | 33.6<br>(31.3-36.0)   | 35.6<br>(33.6-37.5)   | 34.9<br>(32.0-37.9)   | 37.9<br>(35.9-39.9)   | 39.6<br>(36.1-43.1)   | 42.4<br>(38.6-46.3)   | <.001              |                                     |
| Men <sup>d</sup>                                  | 26.9<br>(23.6-30.2)   | 27.1<br>(24.8-29.3)   | 30.8<br>(28.1-33.5)   | 32.8<br>(28.4-37.1)   | 32.0<br>(29.1-34.9)   | 35.2<br>(31.6-38.9)   | 33.6<br>(30.7-36.4)   | 35.1<br>(32.8-37.3)   | 37.9<br>(33.0-42.7)   | 43.0<br>(37.4-48.7)   | <.001              |                                     |
| Women <sup>d</sup>                                | 33.4<br>(29.7-37.2)   | 32.6<br>(29.5-35.7)   | 33.1<br>(29.5-36.6)   | 35.1<br>(32.1-38.0)   | 35.5<br>(33.0-37.9)   | 35.8<br>(34.0-37.7)   | 36.2<br>(32.6-39.9)   | 40.7<br>(37.8-43.7)   | 41.3<br>(38.0-44.6)   | 41.9<br>(37.7-46.0)   | <.001              |                                     |
| Non-cardiovascular disease                        | 29.9<br>(26.7-33.0)   | 29.2<br>(27.1-31.3)   | 31.1<br>(28.7-33.6)   | 33.2<br>(30.4-36.0)   | 33.0<br>(30.6-35.4)   | 34.7<br>(32.5-36.8)   | 34.1<br>(31.2-37.1)   | 37.2<br>(35.3-39.2)   | 38.7<br>(35.2-42.2)   | 41.6<br>(37.9-45.4)   | <.001              |                                     |
| History of cardiovascular disease                 | 46.2<br>(29.4-62.9)   | 43.0<br>(29.9-56.2)   | 46.2<br>(28.8-63.7)   | 39.0<br>(24.8-53.3)   | 47.6<br>(35.8-59.4)   | 46.1<br>(38.6-53.7)   | 48.6<br>(36.4-60.9)   | 47.4<br>(40.7-54.0)   | 53.6<br>(39.8-67.3)   | 60.6<br>(48.3-72.9)   | <.001              |                                     |
| <b>Hypertension, %</b>                            |                       |                       |                       |                       |                       |                       |                       |                       |                       |                       |                    |                                     |
| Overall                                           | 47.3<br>(44.1-50.5)   | 46.5<br>(43.6-49.3)   | 44.8<br>(41.4-48.1)   | 44.1<br>(41.6-46.6)   | 43.9<br>(42.1-45.8)   | 42.9<br>(40.5-45.4)   | 44.7<br>(42.8-46.6)   | 42.9<br>(41.1-44.7)   | 44.4<br>(42.1-46.7)   | 46.5<br>(43.5-49.5)   |                    | .007                                |
| Men <sup>d</sup>                                  | 53.1<br>(49.1-57.0)   | 50.9<br>(46.5-55.3)   | 49.4<br>(45.1-53.8)   | 48.8<br>(45.7-51.9)   | 48.2<br>(45.9-50.4)   | 46.8<br>(43.3-50.2)   | 49.1<br>(46.0-52.1)   | 46.6<br>(43.7-49.6)   | 48.3<br>(44.9-51.8)   | 52.7<br>(48.9-56.6)   |                    | .002                                |
| Women <sup>d</sup>                                | 42.3<br>(38.8-45.8)   | 42.5<br>(39.6-45.4)   | 40.9<br>(38.0-43.8)   | 40.1<br>(37.3-43.0)   | 40.3<br>(38.0-42.5)   | 39.6<br>(37.4-41.9)   | 41.1<br>(38.7-43.6)   | 39.9<br>(37.6-42.2)   | 40.9<br>(38.2-43.7)   | 41.0<br>(37.8-44.3)   | .25                |                                     |

| <b>Elevated cardiovascular risk factors<sup>b</sup></b> | <b>1999-2000<br/>(n=4158)</b> | <b>2001-2002<br/>(n=4685)</b> | <b>2003-2004<br/>(n=4486)</b> | <b>2005-2006<br/>(n=4410)</b> | <b>2007-2008<br/>(n=5619)</b> | <b>2009-2010<br/>(n=5960)</b> | <b>2011-2012<br/>(n=5239)</b> | <b>2013-2014<br/>(n=5484)</b> | <b>2015-2016<br/>(n=5360)</b> | <b>2017-2018<br/>(n=5170)</b> | <b>P for linear trend</b> | <b>P for non-linear trend<sup>c</sup></b> |
|---------------------------------------------------------|-------------------------------|-------------------------------|-------------------------------|-------------------------------|-------------------------------|-------------------------------|-------------------------------|-------------------------------|-------------------------------|-------------------------------|---------------------------|-------------------------------------------|
| Non-cardiovascular disease                              | 46.9<br>(43.6-50.2)           | 45.9<br>(43.1-48.8)           | 43.6<br>(40.1-47.2)           | 43.3<br>(40.4-46.1)           | 43.0<br>(41.2-44.8)           | 41.9<br>(39.4-44.3)           | 43.6<br>(41.3-45.8)           | 42.0<br>(40.2-43.7)           | 43.4<br>(40.9-46.0)           | 45.3<br>(42.2-48.4)           |                           | .004                                      |
| History of cardiovascular disease                       | 41.7<br>(31.3-52.0)           | 64.3<br>(50.7-78.0)           | 59.0<br>(44.3-73.7)           | 45.1<br>(39.3-50.9)           | 59.8<br>(50.4-69.3)           | 64.6<br>(52.7-76.4)           | 60.0<br>(50.8-69.2)           | 61.3<br>(50.4-72.1)           | 63.8<br>(51.7-75.8)           | 73.9<br>(63.4-84.4)           | .41                       |                                           |
| <b>Diabetes, %</b>                                      |                               |                               |                               |                               |                               |                               |                               |                               |                               |                               |                           |                                           |
| Overall                                                 | 8.2 (6.8-9.6)                 | 8.7 (7.3-10.1)                | 9.4 (8.2-10.5)                | 9.1 (8.0-10.2)                | 11.2 (9.6-12.8)               | 10.7 (9.6-11.9)               | 10.8 (9.5-12.1)               | 11.2 (10.2-12.1)              | 12.6 (10.9-14.3)              | 12.7 (11.5-14.0)              | <.001                     |                                           |
| Men <sup>d</sup>                                        | 9.5 (7.7-11.4)                | 10.2 (8.3-12.2)               | 10.5 (9.0-11.9)               | 9.7 (8.0-11.3)                | 12.7 (10.9-14.4)              | 12.5 (10.4-14.5)              | 12.2 (10.2-14.3)              | 12.9 (11.5-14.3)              | 15.0 (12.3-17.6)              | 14.7 (12.7-16.7)              | <.001                     |                                           |
| Women <sup>d</sup>                                      | 7.3 (5.7-8.9)                 | 7.6 (6.3-8.8)                 | 8.7 (7.5-9.9)                 | 8.8 (7.4-10.1)                | 10.3 (8.4-12.2)               | 9.4 (8.4-10.5)                | 9.8 (8.3-11.3)                | 10.1 (9.1-11.0)               | 10.8 (9.2-12.4)               | 11.4 (9.0-13.8)               | <.001                     |                                           |
| Non-cardiovascular disease                              | 7.3 (5.8-8.8)                 | 7.9 (6.5-9.3)                 | 8.3 (7.2-9.4)                 | 8.0 (6.7-9.3)                 | 9.8 (8.5-11.1)                | 9.8 (8.5-11.1)                | 9.7 (8.7-10.7)                | 9.9 (8.9-10.9)                | 11.6 (9.6-13.5)               | 11.3 (10.0-12.6)              | <.001                     |                                           |
| History of cardiovascular disease                       | 15.0 (10.9-19.1)              | 21.5 (10.6-32.5)              | 15.4 (11.6-19.2)              | 16.3 (12.4-20.2)              | 22.4 (16.5-28.3)              | 17.1 (13.5-20.7)              | 22.2 (16.8-27.5)              | 25.8 (19.3-32.3)              | 25.8 (15.0-36.6)              | 25.9 (18.5-33.4)              | <.001                     |                                           |
| <b>High total cholesterol, %</b>                        |                               |                               |                               |                               |                               |                               |                               |                               |                               |                               |                           |                                           |
| Overall                                                 | 25.7 (22.7-28.7)              | 26.8 (24.9-28.7)              | 29.7 (28.2-31.1)              | 29.4 (26.6-32.1)              | 30.4 (27.9-32.9)              | 30.1 (28.0-32.2)              | 27.6 (25.9-29.4)              | 27.1 (25.1-29.1)              | 26.6 (25.4-27.8)              | 24.8 (23.2-26.5)              |                           | <.001                                     |
| Men <sup>d</sup>                                        | 26.7 (23.7-29.7)              | 29.3 (26.8-31.7)              | 31.1 (28.6-33.6)              | 28.6 (24.8-32.4)              | 31.8 (28.1-35.6)              | 31.9 (29.3-34.5)              | 27.4 (25.3-29.6)              | 28.8 (27.0-30.6)              | 29.3 (27.0-31.5)              | 26.6 (23.9-29.3)              |                           | .01                                       |

| Elevated cardiovascular risk factors <sup>b</sup> | 1999-2000<br>(n=4158) | 2001-2002<br>(n=4685) | 2003-2004<br>(n=4486) | 2005-2006<br>(n=4410) | 2007-2008<br>(n=5619) | 2009-2010<br>(n=5960) | 2011-2012<br>(n=5239) | 2013-2014<br>(n=5484) | 2015-2016<br>(n=5360) | 2017-2018<br>(n=5170) | <i>P</i> for linear trend | <i>P</i> for non-linear trend <sup>c</sup> |
|---------------------------------------------------|-----------------------|-----------------------|-----------------------|-----------------------|-----------------------|-----------------------|-----------------------|-----------------------|-----------------------|-----------------------|---------------------------|--------------------------------------------|
| Women <sup>d</sup>                                | 24.9<br>(21.1-28.7)   | 24.3<br>(21.7-26.9)   | 28.5<br>(25.5-31.5)   | 30.3<br>(26.6-34.1)   | 29.5<br>(26.6-32.3)   | 28.7<br>(26.0-31.4)   | 28.2<br>(25.9-30.5)   | 25.9<br>(23.2-28.7)   | 24.6<br>(22.8-26.4)   | 23.5<br>(21.1-26.0)   |                           | <.001                                      |
| Non-cardiovascular disease                        | 24.2<br>(21.1-27.2)   | 25.3<br>(23.3-27.3)   | 28.2<br>(26.8-29.7)   | 28.2<br>(25.5-30.9)   | 29.3<br>(26.8-31.8)   | 29.1<br>(26.8-31.3)   | 26.0<br>(24.1-28.0)   | 25.4<br>(23.4-27.5)   | 24.8<br>(23.3-26.3)   | 23.0<br>(21.0-25.0)   |                           | <.001                                      |
| History of cardiovascular disease                 | 33.1<br>(27.2-39.0)   | 49.1<br>(40.1-58.0)   | 39.7<br>(25.0-54.3)   | 33.6<br>(28.7-38.6)   | 59.1<br>(45.7-72.4)   | 39.5<br>(28.1-50.9)   | 38.8<br>(33.6-44.1)   | 50.7<br>(39.8-61.6)   | 35.3<br>(31.1-39.6)   | 40.8<br>(35.4-46.1)   | <.001                     |                                            |

<sup>a</sup> Age- and sex-adjusted for the entire US population by the direct standardization method to the US 2000 Census population using the following age and sex categories: 20-39 male, 40-59 male, 60 years or older male, 20-39 female, 40-59 female, and 60 years or older female.

<sup>b</sup> Obesity was defined as body mass index  $\geq 30$ ; hypertension as blood pressure  $\geq 130/80$  mmHg or use of antihypertensive medications; diabetes as fasting plasma glucose  $\geq 126$  mg/dL, hemoglobin A1c  $\geq 6.5\%$ , or use of antidiabetic medications; and high total cholesterol as  $\geq 240$  mg/dL or use of lipid-lowering medications.

<sup>c</sup> Nonlinear trend was tested first by adding a quadratic term into the regression model. If not significant, linear trend was tested.

<sup>d</sup> Age-adjusted for the entire US population by the direct standardization method to the US 2000 Census population using three age categories: 20-39, 40-59, and 60 years or older.

**eTable 4. Age-Sex-Adjusted and Age-Adjusted Prevalences (95% Confidence Intervals) of Self-Reported History of Cardiovascular Disease and Use of Medications in US Adults Aged ≥20 Years, NHANES 1999-2018<sup>a</sup>**

| Medical history                                   | 1999-2000<br>(n=4158) | 2001-2002<br>(n=4685) | 2003-2004<br>(n=4486) | 2005-2006<br>(n=4410) | 2007-2008<br>(n=5619) | 2009-2010<br>(n=5960) | 2011-2012<br>(n=5239) | 2013-2014<br>(n=5484) | 2015-2016<br>(n=5360) | 2017-2018<br>(n=5170) | P for linear trend | P for non-linear trend <sup>b</sup> |
|---------------------------------------------------|-----------------------|-----------------------|-----------------------|-----------------------|-----------------------|-----------------------|-----------------------|-----------------------|-----------------------|-----------------------|--------------------|-------------------------------------|
| <b>Use of any antihypertensive medications, %</b> |                       |                       |                       |                       |                       |                       |                       |                       |                       |                       |                    |                                     |
| Overall                                           | 17.2<br>(15.1-19.3)   | 17.7<br>(16.1-19.3)   | 20.2<br>(18.1-22.3)   | 20.3<br>(18.8-21.8)   | 21.8<br>(20.4-23.2)   | 22.3<br>(20.5-24.1)   | 22.0<br>(20.1-23.8)   | 22.7<br>(20.6-24.8)   | 21.7<br>(19.8-23.6)   | 21.1<br>(19.0-23.3)   |                    | <.001                               |
| Men <sup>c</sup>                                  | 16.4<br>(13.4-19.5)   | 15.4<br>(13.7-17.1)   | 20.5<br>(18.5-22.4)   | 19.1<br>(17.2-21.1)   | 21.0<br>(19.0-23.0)   | 21.9<br>(19.7-24.2)   | 21.2<br>(18.8-23.5)   | 22.0<br>(19.9-24.1)   | 20.8<br>(17.9-23.7)   | 21.9<br>(19.4-24.4)   |                    | .01                                 |
| Women <sup>c</sup>                                | 18.3<br>(16.2-20.5)   | 20.0<br>(17.6-22.4)   | 20.4<br>(17.5-23.2)   | 21.8<br>(20.1-23.5)   | 22.9<br>(21.2-24.6)   | 23.1<br>(21.2-25.0)   | 23.2<br>(21.3-25.1)   | 23.8<br>(21.2-26.3)   | 22.8<br>(20.5-25.2)   | 20.9<br>(18.6-23.3)   |                    | <.001                               |
| <b>Use of any antidiabetic medications, %</b>     |                       |                       |                       |                       |                       |                       |                       |                       |                       |                       |                    |                                     |
| Overall                                           | 5.3 (4.1-6.5)         | 5.7 (4.8-6.6)         | 6.3 (5.3-7.4)         | 6.2 (5.5-6.9)         | 7.2 (5.7-8.8)         | 7.2 (6.4-7.9)         | 7.2 (6.4-8.1)         | 7.7 (6.8-8.6)         | 8.2 (7.1-9.3)         | 8.6 (7.5-9.6)         | <.001              |                                     |
| Men <sup>c</sup>                                  | 5.6 (3.9-7.2)         | 6.3 (5.1-7.5)         | 6.6 (5.4-7.7)         | 6.1 (4.7-7.4)         | 7.5 (6.2-8.9)         | 7.9 (6.6-9.2)         | 8.0 (7.1-8.9)         | 8.2 (7.1-9.4)         | 10.2 (8.4-12.1)       | 10.4 (8.8-12.0)       | <.001              |                                     |
| Women <sup>c</sup>                                | 5.2 (3.8-6.6)         | 5.3 (4.1-6.6)         | 6.4 (5.2-7.5)         | 6.4 (5.4-7.5)         | 7.2 (5.0-9.4)         | 6.7 (6.0-7.4)         | 6.8 (5.6-8.0)         | 7.6 (6.5-8.6)         | 6.7 (5.4-8.1)         | 7.2 (5.6-8.9)         | .005               |                                     |
| <b>Use of statins, %</b>                          |                       |                       |                       |                       |                       |                       |                       |                       |                       |                       |                    |                                     |
| Overall                                           | 10.3 (9.1-11.4)       | 11.6<br>(10.6-12.5)   | 15.0<br>(13.6-16.4)   | 15.8<br>(14.2-17.4)   | 17.9<br>(16.3-19.5)   | 18.0<br>(16.9-19.1)   | 16.5<br>(14.8-18.1)   | 17.6<br>(15.9-19.2)   | 15.6<br>(14.4-16.8)   | 15.5<br>(14.0-17.0)   |                    | <.001                               |
| Men <sup>c</sup>                                  | 12.1<br>(10.0-14.2)   | 13.6<br>(11.7-15.5)   | 17.4<br>(15.8-18.9)   | 17.0<br>(14.8-19.3)   | 19.6<br>(17.0-22.3)   | 20.4<br>(18.7-22.0)   | 17.3<br>(15.5-19.0)   | 20.1<br>(18.5-21.7)   | 18.9<br>(16.9-20.9)   | 17.6<br>(15.5-19.8)   |                    | <.001                               |
| Women <sup>c</sup>                                | 8.9 (8.1-9.7)         | 9.8 (8.4-11.2)        | 13.2<br>(11.2-15.3)   | 15.1<br>(12.4-17.8)   | 16.9<br>(14.9-18.9)   | 16.3<br>(14.2-18.4)   | 16.2<br>(13.8-18.6)   | 15.8<br>(13.6-17.9)   | 13.2<br>(11.7-14.7)   | 14.1<br>(12.2-15.9)   |                    | <.001                               |

| Medical history                                | 1999-2000<br>(n=4158) | 2001-2002<br>(n=4685) | 2003-2004<br>(n=4486) | 2005-2006<br>(n=4410) | 2007-2008<br>(n=5619) | 2009-2010<br>(n=5960) | 2011-2012<br>(n=5239) | 2013-2014<br>(n=5484) | 2015-2016<br>(n=5360) | 2017-2018<br>(n=5170) | <i>P</i> for linear trend | <i>P</i> for non-linear trend <sup>b</sup> |
|------------------------------------------------|-----------------------|-----------------------|-----------------------|-----------------------|-----------------------|-----------------------|-----------------------|-----------------------|-----------------------|-----------------------|---------------------------|--------------------------------------------|
| <b>Self-reported cardiovascular disease, %</b> |                       |                       |                       |                       |                       |                       |                       |                       |                       |                       |                           |                                            |
| Overall                                        | 7.2 (5.9-8.6)         | 7.3 (6.3-8.4)         | 8.5 (7.0-9.9)         | 7.8 (6.9-8.8)         | 7.6 (6.5-8.6)         | 6.8 (6.0-7.7)         | 7.0 (6.2-7.8)         | 7.3 (6.3-8.3)         | 6.7 (6.0-7.4)         | 7.3 (6.2-8.5)         | .16                       |                                            |
| Men <sup>c</sup>                               | 9.4 (7.2-11.5)        | 8.7 (7.3-10.2)        | 9.9 (8.0-11.7)        | 9.3 (8.1-10.5)        | 9.1 (7.9-10.2)        | 8.9 (7.7-10.1)        | 8.1 (7.0-9.2)         | 8.4 (6.9-9.9)         | 8.0 (6.8-9.2)         | 9.0 (7.3-10.8)        | .20                       |                                            |
| Women <sup>c</sup>                             | 5.6 (4.3-7.0)         | 6.4 (4.9-7.8)         | 7.6 (6.1-9.2)         | 7.0 (5.4-8.6)         | 6.5 (5.1-8.0)         | 5.4 (4.2-6.5)         | 6.3 (5.2-7.5)         | 6.7 (5.2-8.2)         | 5.9 (4.9-6.8)         | 6.2 (4.8-7.6)         | .44                       |                                            |

<sup>a</sup> Age- and sex-adjusted for the entire US population by the direct standardization method to the US 2000 Census population using the following age and sex categories: 20-39 male, 40-59 male, 60 years or older male, 20-39 female, 40-59 female, and 60 years or older female.

<sup>b</sup> Nonlinear trend was tested first by adding a quadratic term into the regression model. If not significant, linear trend was tested.

<sup>c</sup> Age-adjusted for the entire US population by the direct standardization method to the US 2000 Census population using three age categories: 20-39, 40-59, and 60 years or older.

**eTable 5. Age-Sex-Adjusted Mean (95% Confidence Intervals) Cardiovascular Risk Factors Overall and by Race and Socioeconomic Status, NHANES 1999-2018<sup>a</sup>**

| Cardiovascular risk factors                         | 1999-2000              | 2001-2002              | 2003-2004              | 2005-2006              | 2007-2008              | 2009-2010              | 2011-2012              | 2013-2014              | 2015-2016              | 2017-2018              | P for linear trend | P for non-linear trend <sup>b</sup> |
|-----------------------------------------------------|------------------------|------------------------|------------------------|------------------------|------------------------|------------------------|------------------------|------------------------|------------------------|------------------------|--------------------|-------------------------------------|
| <b>Race/ethnicity</b>                               |                        |                        |                        |                        |                        |                        |                        |                        |                        |                        |                    |                                     |
| <b>Body mass index, mean (95% CI)</b>               |                        |                        |                        |                        |                        |                        |                        |                        |                        |                        |                    |                                     |
| Non-Hispanic Asian                                  |                        |                        |                        |                        |                        |                        | 24.6<br>(24.1-25.0)    | 24.8<br>(24.4-25.2)    | 25.0<br>(24.7-25.2)    | 26.3<br>(25.9-26.6)    | <.001              |                                     |
| Non-Hispanic Black                                  | 29.7<br>(29.1-30.2)    | 29.1<br>(28.6-29.6)    | 30.1<br>(29.5-30.8)    | 30.3<br>(29.7-31.0)    | 30.1<br>(29.6-30.6)    | 30.9<br>(30.2-31.5)    | 30.7<br>(30.1-31.3)    | 30.7<br>(30.2-31.3)    | 30.5<br>(29.8-31.2)    | 31.2<br>(30.6-31.7)    | <.001              |                                     |
| Hispanic                                            | 28.3<br>(28.0-28.7)    | 28.0<br>(27.3-28.8)    | 28.7<br>(28.0-29.4)    | 28.7<br>(28.2-29.2)    | 29.4<br>(28.8-29.9)    | 29.3<br>(28.8-29.8)    | 29.6<br>(29.1-30.1)    | 29.8<br>(29.2-30.5)    | 30.6<br>(30.0-31.3)    | 30.3<br>(29.8-30.8)    | <.001              |                                     |
| Non-Hispanic White                                  | 27.7<br>(27.0-28.3)    | 27.8<br>(27.5-28.2)    | 27.9<br>(27.4-28.3)    | 28.2<br>(27.7-28.7)    | 28.3<br>(27.7-28.9)    | 28.4<br>(28.1-28.7)    | 28.4<br>(27.8-28.9)    | 29.0<br>(28.5-29.5)    | 29.1<br>(28.5-29.7)    | 29.7<br>(28.8-30.5)    | <.001              |                                     |
| P for group difference                              | <.001                  | .001                   | <.001                  | <.001                  | .001                   | <.001                  | <.001                  | <.001                  | <.001                  | <.001                  | <.001              |                                     |
| <b>Systolic blood pressure, mmHg, mean (95% CI)</b> |                        |                        |                        |                        |                        |                        |                        |                        |                        |                        |                    |                                     |
| Non-Hispanic Asian                                  |                        |                        |                        |                        |                        |                        | 119.8<br>(118.7-120.8) | 120.3<br>(119.0-121.6) | 121.3<br>(119.7-122.8) | 122.5<br>(121.0-124.1) | .001               |                                     |
| Non-Hispanic Black                                  | 127.6<br>(126.3-128.8) | 128.6<br>(127.9-129.3) | 127.6<br>(125.2-130.0) | 127.1<br>(125.7-128.5) | 125.4<br>(123.6-127.2) | 125.1<br>(122.9-127.4) | 126.1<br>(123.6-128.7) | 126.2<br>(125.3-127.0) | 127.5<br>(125.9-129.0) | 128.5<br>(127.2-129.8) |                    | <.001                               |
| Hispanic                                            | 125.2<br>(122.5-127.9) | 122.7<br>(121.6-123.8) | 123.2<br>(120.6-125.7) | 122.2<br>(120.0-124.5) | 122.2<br>(120.3-124.1) | 121.7<br>(120.4-122.9) | 120.5<br>(118.8-122.1) | 121.6<br>(120.5-122.7) | 123.8<br>(123.1-124.6) | 123.1<br>(121.7-124.5) |                    | .003                                |
| Non-Hispanic White                                  | 122.5<br>(121.0-124.0) | 122.2<br>(121.1-123.4) | 121.7<br>(120.4-122.9) | 121.6<br>(120.4-122.8) | 121.2<br>(120.3-122.1) | 119.8<br>(119.0-120.7) | 120.8<br>(119.3-122.3) | 120.3<br>(119.6-121.1) | 122.0<br>(121.0-122.9) | 121.9<br>(120.5-123.2) |                    | .002                                |
| P for group difference                              | <.001                  | <.001                  | <.001                  | <.001                  | .003                   | <.001                  | <.001                  | <.001                  | <.001                  | <.001                  |                    | .45                                 |

| Cardiovascular risk factors                    | 1999-2000              | 2001-2002              | 2003-2004              | 2005-2006              | 2007-2008              | 2009-2010              | 2011-2012              | 2013-2014              | 2015-2016              | 2017-2018              | P for linear trend | P for non-linear trend <sup>b</sup> |
|------------------------------------------------|------------------------|------------------------|------------------------|------------------------|------------------------|------------------------|------------------------|------------------------|------------------------|------------------------|--------------------|-------------------------------------|
| <b>Hemoglobin A1c, %, mean (95% CI)</b>        |                        |                        |                        |                        |                        |                        |                        |                        |                        |                        |                    |                                     |
| Non-Hispanic Asian                             |                        |                        |                        |                        |                        |                        | 5.73<br>(5.63-5.83)    | 5.74<br>(5.65-5.82)    | 5.72<br>(5.64-5.79)    | 5.81<br>(5.72-5.90)    | .26                |                                     |
| Non-Hispanic Black                             | 5.72<br>(5.64-5.79)    | 5.74<br>(5.64-5.83)    | 5.71<br>(5.64-5.79)    | 5.78<br>(5.73-5.83)    | 5.86<br>(5.76-5.96)    | 5.84<br>(5.78-5.89)    | 5.90<br>(5.80-6.01)    | 5.82<br>(5.78-5.85)    | 5.91<br>(5.83-5.98)    | 5.86<br>(5.80-5.92)    | <.001              |                                     |
| Hispanic                                       | 5.62<br>(5.50-5.73)    | 5.65<br>(5.55-5.76)    | 5.80<br>(5.70-5.91)    | 5.75<br>(5.61-5.88)    | 5.71<br>(5.65-5.77)    | 5.83<br>(5.72-5.94)    | 5.85<br>(5.76-5.94)    | 5.81<br>(5.75-5.86)    | 5.94<br>(5.80-6.07)    | 5.80<br>(5.71-5.88)    | <.001              |                                     |
| Non-Hispanic White                             | 5.33<br>(5.21-5.44)    | 5.41<br>(5.38-5.44)    | 5.41<br>(5.37-5.46)    | 5.34<br>(5.31-5.38)    | 5.50<br>(5.42-5.58)    | 5.52<br>(5.49-5.55)    | 5.52<br>(5.47-5.57)    | 5.50<br>(5.47-5.53)    | 5.52<br>(5.46-5.58)    | 5.57<br>(5.51-5.64)    | <.001              |                                     |
| P for group difference                         | <.001                  | <.001                  | <.001                  | <.001                  | <.001                  | <.001                  | <.001                  | <.001                  | <.001                  | <.001                  | .004               |                                     |
| <b>Total cholesterol, mg/dL, mean (95% CI)</b> |                        |                        |                        |                        |                        |                        |                        |                        |                        |                        |                    |                                     |
| Non-Hispanic Asian                             |                        |                        |                        |                        |                        |                        | 191.2<br>(187.7-194.8) | 190.3<br>(186.6-194.1) | 190.7<br>(186.3-195.2) | 192.1<br>(186.2-198.0) | .76                |                                     |
| Non-Hispanic Black                             | 195.9<br>(193.3-198.5) | 198.8<br>(193.5-204.1) | 196.3<br>(193.1-199.5) | 189.9<br>(187.4-192.4) | 192.5<br>(189.2-195.9) | 189.9<br>(187.4-192.3) | 188.9<br>(186.5-191.3) | 182.7<br>(179.7-185.8) | 185.3<br>(181.4-189.3) | 185.4<br>(181.3-189.6) | <.001              |                                     |
| Hispanic                                       | 202.0<br>(197.8-206.2) | 201.7<br>(195.6-207.8) | 201.6<br>(198.3-205.0) | 201.9<br>(198.8-205.0) | 198.6<br>(195.9-201.2) | 197.1<br>(194.5-199.7) | 195.2<br>(192.3-198.1) | 192.6<br>(189.1-196.1) | 190.6<br>(188.0-193.3) | 188.6<br>(183.7-193.5) | <.001              |                                     |
| Non-Hispanic White                             | 204.6<br>(201.4-207.9) | 201.6<br>(198.8-204.4) | 201.7<br>(199.9-203.5) | 198.4<br>(196.4-200.4) | 196.9<br>(194.8-199.1) | 195.7<br>(193.2-198.2) | 195.1<br>(192.4-197.9) | 189.5<br>(187.5-191.5) | 192.8<br>(190.1-195.5) | 188.4<br>(183.9-192.9) | <.001              |                                     |
| P for group difference                         | .004                   | .52                    | .009                   | <.001                  | .05                    | <.001                  | <.001                  | .002                   | <.001                  | .22                    | .03                |                                     |
| <b>Current cigarette smoking, %</b>            |                        |                        |                        |                        |                        |                        |                        |                        |                        |                        |                    |                                     |
| Non-Hispanic Asian                             |                        |                        |                        |                        |                        |                        | 10.4<br>(8.2-12.5)     | 8.6 (6.3-10.9)         | 10.0<br>(5.8-14.1)     | 7.4 (4.2-10.6)         | .16                |                                     |

| Cardiovascular risk factors                                                              | 1999-2000           | 2001-2002           | 2003-2004           | 2005-2006           | 2007-2008           | 2009-2010           | 2011-2012           | 2013-2014           | 2015-2016           | 2017-2018           | P for linear trend | P for non-linear trend <sup>b</sup> |
|------------------------------------------------------------------------------------------|---------------------|---------------------|---------------------|---------------------|---------------------|---------------------|---------------------|---------------------|---------------------|---------------------|--------------------|-------------------------------------|
| Non-Hispanic Black                                                                       | 26.4<br>(22.7-30.1) | 28.3<br>(23.7-32.9) | 25.9<br>(20.4-31.4) | 23.8<br>(19.4-28.2) | 26.8<br>(22.7-30.8) | 27.9<br>(22.8-32.9) | 22.7<br>(18.8-26.7) | 27.0<br>(23.4-30.6) | 24.8<br>(22.0-27.6) | 22.1<br>(17.6-26.6) | .08                |                                     |
| Hispanic                                                                                 | 20.8<br>(15.2-26.3) | 26.2<br>(20.1-32.3) | 23.2<br>(20.3-26.2) | 17.7<br>(14.9-20.5) | 18.2<br>(14.4-22.1) | 18.0<br>(15.5-20.5) | 16.4<br>(13.6-19.2) | 13.6<br>(11.1-16.1) | 15.5<br>(13.3-17.6) | 12.6<br>(8.8-16.4)  | <.001              |                                     |
| Non-Hispanic White                                                                       | 25.8<br>(21.8-29.7) | 25.3<br>(22.0-28.6) | 27.4<br>(25.2-29.6) | 26.7<br>(22.6-30.9) | 24.7<br>(20.7-28.7) | 21.3<br>(18.9-23.6) | 21.4<br>(17.6-25.3) | 22.7<br>(19.2-26.1) | 19.5<br>(16.0-22.9) | 19.6<br>(15.9-23.2) | <.001              |                                     |
| P for group difference                                                                   | .13                 | .56                 | .10                 | .001                | .02                 | .01                 | <.001               | <.001               | <.001               | <.001               | .009               |                                     |
| <b>10-year risk of atherosclerotic cardiovascular disease, mean (95% CI)<sup>c</sup></b> |                     |                     |                     |                     |                     |                     |                     |                     |                     |                     |                    |                                     |
| Non-Hispanic Asian                                                                       |                     |                     |                     |                     |                     |                     | 6.3 (5.7-7.0)       | 6.0 (5.6-6.5)       | 6.7 (5.3-8.1)       | 6.6 (6.0-7.3)       | .26                |                                     |
| Non-Hispanic Black                                                                       | 9.1 (8.3-9.8)       | 7.9 (7.2-8.6)       | 7.7 (7.1-8.4)       | 8.1 (7.2-8.9)       | 7.9 (7.2-8.6)       | 7.8 (7.1-8.4)       | 7.9 (7.4-8.4)       | 7.6 (7.3-8.0)       | 8.0 (7.2-8.8)       | 8.3 (7.5-9.0)       |                    | .03                                 |
| Hispanic                                                                                 | 7.3 (5.9-8.7)       | 8.3 (6.5-10.2)      | 7.5 (6.2-8.8)       | 6.4 (5.5-7.3)       | 6.9 (6.2-7.6)       | 7.1 (6.4-7.8)       | 6.6 (6.0-7.1)       | 5.8 (5.4-6.3)       | 6.7 (5.8-7.5)       | 6.4 (5.8-6.9)       | .02                |                                     |
| Non-Hispanic White                                                                       | 7.5 (6.6-8.4)       | 7.2 (6.8-7.5)       | 6.8 (6.3-7.4)       | 6.8 (6.2-7.4)       | 6.8 (6.2-7.4)       | 6.4 (6.0-6.8)       | 6.3 (5.8-6.7)       | 6.5 (6.0-7.0)       | 6.4 (5.8-6.9)       | 6.3 (5.8-6.8)       | <.001              |                                     |
| P for group difference                                                                   | .04                 | .002                | .04                 | .005                | .02                 | .004                | <.001               | <.001               | .001                | .003                |                    | .97                                 |
| <b>Educational Attainment</b>                                                            |                     |                     |                     |                     |                     |                     |                     |                     |                     |                     |                    |                                     |
| <b>Body mass index, mean (95% CI)</b>                                                    |                     |                     |                     |                     |                     |                     |                     |                     |                     |                     |                    |                                     |
| <High school                                                                             | 28.4<br>(27.6-29.2) | 28.4<br>(27.8-29.0) | 28.4<br>(27.7-29.1) | 28.8<br>(28.4-29.1) | 29.1<br>(28.6-29.7) | 29.1<br>(28.6-29.7) | 29.2<br>(28.5-29.8) | 29.3<br>(28.8-29.8) | 29.6<br>(29.0-30.3) | 29.6<br>(28.5-30.6) | <.001              |                                     |
| High school graduate                                                                     | 28.5<br>(27.9-29.0) | 28.3<br>(27.7-29.0) | 28.7<br>(28.2-29.1) | 29.1<br>(28.6-29.7) | 28.9<br>(28.3-29.6) | 29.1<br>(28.7-29.6) | 29.6<br>(28.9-30.3) | 29.9<br>(29.1-30.6) | 30.0<br>(29.1-30.8) | 30.3<br>(29.9-30.8) | <.001              |                                     |
| Some college                                                                             | 28.2<br>(27.6-28.8) | 28.3<br>(27.7-28.9) | 28.3<br>(27.9-28.8) | 29.0<br>(28.4-29.6) | 28.9<br>(28.4-29.3) | 29.2<br>(28.9-29.6) | 29.1<br>(28.6-29.6) | 30.1<br>(29.5-30.7) | 30.1<br>(29.4-30.7) | 30.7<br>(30.0-31.3) | <.001              |                                     |



| Cardiovascular risk factors                         | 1999-2000              | 2001-2002              | 2003-2004              | 2005-2006              | 2007-2008              | 2009-2010              | 2011-2012              | 2013-2014              | 2015-2016              | 2017-2018              | P for linear trend | P for non-linear trend <sup>b</sup> |
|-----------------------------------------------------|------------------------|------------------------|------------------------|------------------------|------------------------|------------------------|------------------------|------------------------|------------------------|------------------------|--------------------|-------------------------------------|
| ≥College graduate                                   | 26.6<br>(25.9-27.3)    | 27.0<br>(26.6-27.4)    | 27.3<br>(26.5-28.0)    | 27.2<br>(26.5-27.9)    | 27.4<br>(26.7-28.0)    | 27.4<br>(26.8-28.1)    | 27.5<br>(26.8-28.2)    | 27.6<br>(27.1-28.0)    | 28.2<br>(27.5-28.8)    | 28.6<br>(27.6-29.6)    | <.001              |                                     |
| P for group difference                              | <.001                  | .002                   | .02                    | <.001                  | <.001                  | <.001                  | <.001                  | <.001                  | .002                   | <.001                  | .80                |                                     |
| <b>Systolic blood pressure, mmHg, mean (95% CI)</b> |                        |                        |                        |                        |                        |                        |                        |                        |                        |                        |                    |                                     |
| <High school                                        | 125.9<br>(124.5-127.2) | 125.3<br>(124.0-126.6) | 124.7<br>(123.2-126.1) | 123.7<br>(121.6-125.8) | 123.6<br>(122.3-124.9) | 122.5<br>(121.0-123.9) | 123.0<br>(121.3-124.7) | 123.0<br>(121.4-124.6) | 124.9<br>(123.1-126.6) | 125.5<br>(124.0-127.0) |                    | <.001                               |
| High school graduate                                | 123.4<br>(122.0-124.8) | 123.1<br>(122.2-124.0) | 122.8<br>(121.2-124.4) | 123.0<br>(121.8-124.3) | 122.9<br>(121.8-124.0) | 121.3<br>(120.0-122.7) | 122.1<br>(120.6-123.7) | 122.7<br>(121.3-124.1) | 124.3<br>(122.5-126.1) | 124.0<br>(122.8-125.2) |                    | .003                                |
| Some college                                        | 123.6<br>(121.4-125.7) | 123.0<br>(121.5-124.5) | 122.7<br>(121.1-124.3) | 122.4<br>(120.9-123.9) | 122.0<br>(120.9-123.1) | 120.7<br>(119.5-121.9) | 121.5<br>(120.2-122.8) | 121.7<br>(120.9-122.5) | 123.1<br>(121.7-124.6) | 123.5<br>(122.5-124.5) |                    | .001                                |
| ≥College graduate                                   | 120.5<br>(118.3-122.7) | 121.8<br>(119.7-123.8) | 120.3<br>(118.9-121.7) | 119.8<br>(118.7-120.8) | 118.5<br>(117.3-119.6) | 117.8<br>(116.2-119.3) | 119.3<br>(117.4-121.2) | 118.8<br>(117.7-119.9) | 120.7<br>(119.5-121.9) | 119.9<br>(118.0-121.7) |                    | .02                                 |
| P for group difference                              | <.001                  | .007                   | <.001                  | <.001                  | <.001                  | <.001                  | .006                   | <.001                  | <.001                  | <.001                  |                    | .44                                 |
| <b>Hemoglobin A1c, %, mean (95% CI)</b>             |                        |                        |                        |                        |                        |                        |                        |                        |                        |                        |                    |                                     |
| <High school                                        | 5.64<br>(5.56-5.71)    | 5.67<br>(5.63-5.72)    | 5.72<br>(5.61-5.83)    | 5.66<br>(5.56-5.76)    | 5.72<br>(5.66-5.77)    | 5.78<br>(5.70-5.85)    | 5.82<br>(5.73-5.90)    | 5.77<br>(5.70-5.84)    | 5.85<br>(5.74-5.96)    | 5.81<br>(5.75-5.88)    | <.001              |                                     |
| High school graduate                                | 5.44<br>(5.35-5.53)    | 5.48<br>(5.43-5.52)    | 5.46<br>(5.43-5.50)    | 5.47<br>(5.39-5.56)    | 5.64<br>(5.56-5.72)    | 5.60<br>(5.54-5.67)    | 5.73<br>(5.65-5.80)    | 5.64<br>(5.59-5.68)    | 5.70<br>(5.63-5.77)    | 5.72<br>(5.65-5.79)    | <.001              |                                     |
| Some college                                        | 5.39<br>(5.22-5.55)    | 5.48<br>(5.42-5.54)    | 5.47<br>(5.41-5.53)    | 5.43<br>(5.38-5.48)    | 5.57<br>(5.50-5.63)    | 5.64<br>(5.60-5.68)    | 5.60<br>(5.55-5.66)    | 5.63<br>(5.58-5.67)    | 5.65<br>(5.56-5.75)    | 5.64<br>(5.60-5.68)    | <.001              |                                     |
| ≥College graduate                                   | 5.17<br>(5.07-5.27)    | 5.38<br>(5.31-5.45)    | 5.40<br>(5.35-5.46)    | 5.30<br>(5.24-5.36)    | 5.42<br>(5.36-5.48)    | 5.47<br>(5.44-5.50)    | 5.49<br>(5.42-5.55)    | 5.44<br>(5.38-5.50)    | 5.51<br>(5.45-5.57)    | 5.56<br>(5.48-5.63)    | <.001              |                                     |
| P for group difference                              | <.001                  | <.001                  | <.001                  | <.001                  | <.001                  | <.001                  | <.001                  | <.001                  | <.001                  | <.001                  | .33                |                                     |

| Cardiovascular risk factors                                                              | 1999-2000              | 2001-2002              | 2003-2004              | 2005-2006              | 2007-2008              | 2009-2010              | 2011-2012              | 2013-2014              | 2015-2016              | 2017-2018              | P for linear trend | P for non-linear trend <sup>b</sup> |
|------------------------------------------------------------------------------------------|------------------------|------------------------|------------------------|------------------------|------------------------|------------------------|------------------------|------------------------|------------------------|------------------------|--------------------|-------------------------------------|
| <b>Total cholesterol, mg/dL, mean (95% CI)</b>                                           |                        |                        |                        |                        |                        |                        |                        |                        |                        |                        |                    |                                     |
| <High school                                                                             | 202.2<br>(198.4-206.0) | 198.6<br>(195.6-201.5) | 203.6<br>(200.2-207.1) | 198.4<br>(196.1-200.8) | 196.7<br>(193.8-199.6) | 196.3<br>(192.3-200.4) | 192.8<br>(189.6-196.0) | 187.4<br>(184.8-190.0) | 188.7<br>(185.2-192.1) | 188.3<br>(185.0-191.5) | <.001              |                                     |
| High school graduate                                                                     | 208.0<br>(203.4-212.6) | 204.1<br>(201.0-207.3) | 199.3<br>(196.4-202.2) | 198.6<br>(195.2-202.1) | 195.6<br>(192.4-198.8) | 194.9<br>(192.5-197.3) | 193.8<br>(191.1-196.4) | 187.2<br>(183.5-190.9) | 191.4<br>(187.8-195.0) | 187.1<br>(182.1-192.0) | <.001              |                                     |
| Some college                                                                             | 201.7<br>(199.3-204.0) | 201.7<br>(197.6-205.7) | 202.6<br>(200.3-204.9) | 196.2<br>(193.3-199.2) | 198.5<br>(195.7-201.3) | 195.0<br>(192.8-197.2) | 194.1<br>(191.7-196.6) | 189.6<br>(186.8-192.4) | 192.3<br>(188.2-196.4) | 188.3<br>(183.8-192.8) | <.001              |                                     |
| ≥College graduate                                                                        | 201.4<br>(197.6-205.2) | 201.2<br>(198.6-203.8) | 199.5<br>(196.9-202.1) | 199.5<br>(194.7-204.2) | 196.0<br>(192.9-199.0) | 195.5<br>(190.9-200.1) | 196.0<br>(192.4-199.5) | 190.9<br>(187.6-194.2) | 192.5<br>(188.6-196.5) | 190.4<br>(186.7-194.1) | <.001              |                                     |
| P for group difference                                                                   | .03                    | .02                    | .01                    | .63                    | .19                    | .99                    | .26                    | .20                    | .18                    | .24                    | .001               |                                     |
| <b>Current cigarette smoking, %</b>                                                      |                        |                        |                        |                        |                        |                        |                        |                        |                        |                        |                    |                                     |
| <High school                                                                             | 34.8<br>(29.5-40.0)    | 38.9<br>(35.9-41.9)    | 35.7<br>(31.1-40.2)    | 35.9<br>(30.3-41.5)    | 35.4<br>(30.1-40.6)    | 33.0<br>(28.3-37.7)    | 31.4<br>(26.9-35.9)    | 32.0<br>(27.4-36.7)    | 27.9<br>(21.5-34.3)    | 28.6<br>(23.3-34.0)    | <.001              |                                     |
| High school graduate                                                                     | 32.3<br>(27.6-37.0)    | 32.0<br>(29.6-34.5)    | 33.2<br>(29.8-36.5)    | 31.5<br>(26.2-36.8)    | 29.2<br>(24.6-33.7)    | 28.8<br>(25.8-31.7)    | 27.3<br>(22.4-32.2)    | 28.8<br>(25.5-32.1)    | 27.8<br>(24.7-30.8)    | 26.0<br>(22.8-29.3)    | <.001              |                                     |
| Some college                                                                             | 22.0<br>(17.3-26.6)    | 23.6<br>(20.5-26.7)    | 25.9<br>(23.3-28.5)    | 22.5<br>(19.7-25.3)    | 21.6<br>(19.0-24.1)    | 20.3<br>(17.6-22.9)    | 23.6<br>(20.0-27.1)    | 22.1<br>(18.8-25.3)    | 20.7<br>(17.4-24.0)    | 19.3<br>(16.5-22.0)    | .03                |                                     |
| ≥College graduate                                                                        | 11.1<br>(7.7-14.5)     | 10.8<br>(8.2-13.5)     | 11.9<br>(9.7-14.2)     | 12.7<br>(9.5-15.9)     | 11.2<br>(9.1-13.3)     | 7.6 (5.3-9.8)          | 7.1 (5.6-8.7)          | 8.1 (6.4-9.8)          | 8.7 (6.6-10.7)         | 6.9 (4.5-9.3)          | <.001              |                                     |
| P for group difference                                                                   | <.001                  | <.001                  | <.001                  | <.001                  | <.001                  | <.001                  | <.001                  | <.001                  | <.001                  | <.001                  | .31                |                                     |
| <b>10-year risk of atherosclerotic cardiovascular disease, mean (95% CI)<sup>c</sup></b> |                        |                        |                        |                        |                        |                        |                        |                        |                        |                        |                    |                                     |
| <High school                                                                             | 9.0 (8.1-10.0)         | 9.1 (8.3-9.8)          | 9.3 (8.4-10.2)         | 8.7 (7.6-9.8)          | 8.6 (8.2-9.1)          | 8.4 (7.9-8.9)          | 8.0 (7.4-8.6)          | 7.7 (7.2-8.2)          | 8.1 (6.9-9.3)          | 8.3 (7.5-9.1)          | .004               |                                     |

| Cardiovascular risk factors                         | 1999-2000           | 2001-2002           | 2003-2004           | 2005-2006           | 2007-2008           | 2009-2010           | 2011-2012           | 2013-2014           | 2015-2016           | 2017-2018           | P for linear trend | P for non-linear trend <sup>b</sup> |
|-----------------------------------------------------|---------------------|---------------------|---------------------|---------------------|---------------------|---------------------|---------------------|---------------------|---------------------|---------------------|--------------------|-------------------------------------|
| High school graduate                                | 8.1 (7.1-9.1)       | 7.5 (7.0-8.0)       | 7.1 (6.7-7.6)       | 7.2 (6.6-7.8)       | 7.7 (7.0-8.4)       | 7.1 (6.5-7.7)       | 7.2 (6.1-8.2)       | 7.3 (6.4-8.2)       | 7.3 (6.6-8.1)       | 7.1 (6.6-7.6)       | .15                |                                     |
| Some college                                        | 6.9 (6.2-7.6)       | 7.5 (6.9-8.1)       | 6.6 (5.8-7.4)       | 6.9 (6.2-7.6)       | 6.7 (6.2-7.2)       | 6.6 (6.3-7.0)       | 6.6 (6.3-6.9)       | 6.7 (6.1-7.4)       | 6.8 (6.1-7.5)       | 6.6 (6.2-7.0)       | .19                |                                     |
| ≥College graduate                                   | 5.8 (5.0-6.5)       | 5.5 (5.0-5.9)       | 5.6 (4.8-6.5)       | 5.1 (4.6-5.7)       | 4.9 (4.3-5.5)       | 5.0 (4.3-5.8)       | 4.9 (4.5-5.3)       | 5.1 (4.6-5.7)       | 5.4 (4.9-5.9)       | 5.5 (4.9-6.1)       |                    | .01                                 |
| P for group difference                              | <.001               | <.001               | <.001               | <.001               | <.001               | <.001               | <.001               | <.001               | <.001               | <.001               |                    | .08                                 |
| <b>Family Income</b>                                |                     |                     |                     |                     |                     |                     |                     |                     |                     |                     |                    |                                     |
| <b>Body mass index, mean (95% CI)</b>               |                     |                     |                     |                     |                     |                     |                     |                     |                     |                     |                    |                                     |
| Income-to-poverty ratio ≤100%                       | 28.3 (27.7-28.9)    | 28.5 (27.6-29.5)    | 28.2 (27.6-28.8)    | 28.9 (28.2-29.6)    | 28.6 (28.1-29.1)    | 28.9 (28.3-29.6)    | 28.9 (28.3-29.4)    | 29.5 (28.7-30.2)    | 30.2 (29.6-30.9)    | 29.8 (28.9-30.7)    | <.001              |                                     |
| Income-to-poverty ratio >100-299%                   | 28.6 (27.9-29.3)    | 28.3 (27.8-28.8)    | 28.3 (27.9-28.8)    | 28.9 (28.2-29.6)    | 29.1 (28.6-29.5)    | 29.1 (28.6-29.6)    | 29.5 (28.8-30.1)    | 30.2 (29.6-30.8)    | 29.6 (28.8-30.4)    | 30.2 (29.5-31.0)    | <.001              |                                     |
| Income-to-poverty ratio 300-499%                    | 27.9 (27.1-28.7)    | 27.8 (27.3-28.3)    | 28.3 (27.8-28.8)    | 28.4 (27.6-29.2)    | 28.7 (28.2-29.2)    | 28.8 (28.1-29.5)    | 28.6 (27.7-29.4)    | 28.9 (28.4-29.5)    | 29.7 (28.8-30.6)    | 29.9 (29.0-30.9)    | <.001              |                                     |
| Income-to-poverty ratio ≥500%                       | 27.2 (26.3-28.1)    | 27.1 (26.6-27.6)    | 27.4 (26.7-28.1)    | 27.8 (27.0-28.6)    | 27.6 (27.1-28.1)    | 27.8 (27.2-28.4)    | 27.4 (26.9-28.0)    | 27.7 (27.1-28.4)    | 28.5 (27.6-29.3)    | 29.1 (28.1-30.1)    | <.001              |                                     |
| P for group difference                              | .11                 | .006                | .047                | .006                | .009                | .01                 | <.001               | <.001               | .02                 | .31                 | .36                |                                     |
| <b>Systolic blood pressure, mmHg, mean (95% CI)</b> |                     |                     |                     |                     |                     |                     |                     |                     |                     |                     |                    |                                     |
| Income-to-poverty ratio ≤100%                       | 125.2 (123.2-127.1) | 123.5 (121.4-125.5) | 123.9 (122.1-125.7) | 123.9 (121.9-125.8) | 123.0 (121.4-124.6) | 122.7 (121.0-124.4) | 123.1 (121.4-124.8) | 122.8 (121.3-124.3) | 124.5 (123.1-125.9) | 124.9 (122.6-127.2) |                    | .02                                 |
| Income-to-poverty ratio >100-299%                   | 124.0 (122.7-125.3) | 123.5 (122.0-125.1) | 123.4 (121.9-124.8) | 123.6 (122.3-125.0) | 122.5 (121.6-123.3) | 121.2 (120.1-122.3) | 122.4 (120.9-124.0) | 122.5 (121.5-123.5) | 123.6 (122.7-124.6) | 124.7 (123.5-125.9) | <.001              |                                     |
| Income-to-poverty ratio 300-499%                    | 123.7 (122.3-125.1) | 122.9 (121.5-124.2) | 122.3 (120.5-124.1) | 122.5 (120.7-124.2) | 121.4 (120.2-122.6) | 120.7 (119.4-122.0) | 120.0 (118.9-121.1) | 120.2 (119.1-121.4) | 121.3 (120.0-122.7) | 122.2 (120.0-124.4) |                    | .03                                 |

| <b>Cardiovascular risk factors</b>             | <b>1999-2000</b>       | <b>2001-2002</b>       | <b>2003-2004</b>       | <b>2005-2006</b>       | <b>2007-2008</b>       | <b>2009-2010</b>       | <b>2011-2012</b>       | <b>2013-2014</b>       | <b>2015-2016</b>       | <b>2017-2018</b>       | <b>P for linear trend</b> | <b>P for non-linear trend<sup>b</sup></b> |
|------------------------------------------------|------------------------|------------------------|------------------------|------------------------|------------------------|------------------------|------------------------|------------------------|------------------------|------------------------|---------------------------|-------------------------------------------|
| Income-to-poverty ratio ≥500%                  | 121.5<br>(119.5-123.5) | 122.7<br>(120.9-124.6) | 121.6<br>(119.7-123.5) | 119.8<br>(118.5-121.2) | 120.3<br>(119.2-121.3) | 118.2<br>(116.8-119.6) | 119.8<br>(117.8-121.7) | 119.8<br>(118.8-120.8) | 121.8<br>(120.2-123.4) | 120.1<br>(118.6-121.5) |                           | .02                                       |
| P for group difference                         | .01                    | .59                    | .25                    | .001                   | .03                    | <.001                  | .002                   | .002                   | <.001                  | <.001                  |                           | .03                                       |
| <b>Hemoglobin A1c, %, mean (95% CI)</b>        |                        |                        |                        |                        |                        |                        |                        |                        |                        |                        |                           |                                           |
| Income-to-poverty ratio ≤100%                  | 5.70<br>(5.54-5.87)    | 5.60<br>(5.50-5.69)    | 5.65<br>(5.55-5.76)    | 5.62<br>(5.50-5.74)    | 5.70<br>(5.62-5.78)    | 5.73<br>(5.64-5.82)    | 5.86<br>(5.76-5.96)    | 5.77<br>(5.67-5.87)    | 5.87<br>(5.74-6.01)    | 5.77<br>(5.71-5.84)    | <.001                     |                                           |
| Income-to-poverty ratio >100-299%              | 5.50<br>(5.40-5.60)    | 5.55<br>(5.49-5.61)    | 5.53<br>(5.47-5.59)    | 5.52<br>(5.46-5.57)    | 5.63<br>(5.55-5.71)    | 5.68<br>(5.62-5.74)    | 5.69<br>(5.61-5.76)    | 5.64<br>(5.60-5.69)    | 5.71<br>(5.61-5.81)    | 5.74<br>(5.68-5.79)    | <.001                     |                                           |
| Income-to-poverty ratio 300-499%               | 5.33<br>(5.20-5.47)    | 5.47<br>(5.41-5.53)    | 5.46<br>(5.43-5.49)    | 5.36<br>(5.31-5.41)    | 5.55<br>(5.49-5.62)    | 5.56<br>(5.50-5.62)    | 5.60<br>(5.51-5.69)    | 5.59<br>(5.55-5.63)    | 5.64<br>(5.57-5.71)    | 5.57<br>(5.49-5.65)    | <.001                     |                                           |
| Income-to-poverty ratio ≥500%                  | 5.20<br>(5.12-5.28)    | 5.36<br>(5.30-5.42)    | 5.41<br>(5.35-5.47)    | 5.37<br>(5.31-5.43)    | 5.43<br>(5.38-5.48)    | 5.49<br>(5.43-5.55)    | 5.44<br>(5.39-5.49)    | 5.47<br>(5.38-5.55)    | 5.45<br>(5.39-5.51)    | 5.58<br>(5.49-5.68)    | <.001                     |                                           |
| P for group difference                         | <.001                  | <.001                  | <.001                  | <.001                  | <.001                  | <.001                  | <.001                  | .003                   | <.001                  | <.001                  | .69                       |                                           |
| <b>Total cholesterol, mg/dL, mean (95% CI)</b> |                        |                        |                        |                        |                        |                        |                        |                        |                        |                        |                           |                                           |
| Income-to-poverty ratio ≤100%                  | 200.7<br>(196.6-204.7) | 197.9<br>(193.5-202.4) | 205.3<br>(201.8-208.8) | 197.2<br>(193.0-201.3) | 196.8<br>(194.0-199.5) | 194.1<br>(190.3-197.9) | 194.1<br>(189.7-198.5) | 185.0<br>(182.1-187.8) | 188.2<br>(183.1-193.2) | 185.8<br>(181.6-189.9) | <.001                     |                                           |
| Income-to-poverty ratio >100-299%              | 204.2<br>(200.3-208.2) | 201.8<br>(198.2-205.4) | 199.7<br>(196.5-202.9) | 197.1<br>(195.4-198.7) | 197.7<br>(194.9-200.6) | 196.5<br>(193.9-199.1) | 193.0<br>(190.8-195.3) | 189.0<br>(186.3-191.6) | 191.6<br>(188.3-194.9) | 187.2<br>(183.1-191.3) | <.001                     |                                           |
| Income-to-poverty ratio 300-499%               | 203.1<br>(199.1-207.0) | 203.9<br>(200.3-207.4) | 200.9<br>(197.8-204.0) | 196.9<br>(193.8-199.9) | 195.6<br>(193.6-197.7) | 194.4<br>(190.3-198.5) | 193.4<br>(190.2-196.7) | 192.1<br>(187.9-196.2) | 189.3<br>(185.6-192.9) | 189.8<br>(185.5-194.1) | <.001                     |                                           |
| Income-to-poverty ratio ≥500%                  | 202.1<br>(198.3-205.9) | 199.9<br>(196.1-203.7) | 201.3<br>(197.1-205.5) | 201.6<br>(198.9-204.3) | 195.6<br>(191.6-199.5) | 195.5<br>(189.9-201.0) | 198.4<br>(194.6-202.3) | 190.6<br>(187.5-193.7) | 196.6<br>(192.8-200.5) | 191.1<br>(185.7-196.6) | <.001                     |                                           |
| P-values for group difference                  | .10                    | .02                    | .36                    | .003                   | .45                    | .44                    | .006                   | .007                   | .002                   | .25                    | .006                      |                                           |

| Cardiovascular risk factors                                                              | 1999-2000           | 2001-2002           | 2003-2004           | 2005-2006           | 2007-2008           | 2009-2010           | 2011-2012           | 2013-2014           | 2015-2016           | 2017-2018           | P for linear trend | P for non-linear trend <sup>b</sup> |
|------------------------------------------------------------------------------------------|---------------------|---------------------|---------------------|---------------------|---------------------|---------------------|---------------------|---------------------|---------------------|---------------------|--------------------|-------------------------------------|
| <b>Current cigarette smoking, %</b>                                                      |                     |                     |                     |                     |                     |                     |                     |                     |                     |                     |                    |                                     |
| Income-to-poverty ratio ≤100%                                                            | 35.7<br>(28.1-43.3) | 38.1<br>(30.3-46.0) | 39.4<br>(33.0-45.8) | 35.5<br>(31.2-39.8) | 38.9<br>(32.1-45.7) | 37.3<br>(32.0-42.6) | 32.4<br>(25.9-38.8) | 35.7<br>(31.5-40.0) | 33.2<br>(28.0-38.4) | 35.4<br>(29.3-41.5) | .15                |                                     |
| Income-to-poverty ratio >100-299%                                                        | 28.2<br>(24.2-32.2) | 31.3<br>(27.2-35.3) | 28.9<br>(26.3-31.5) | 28.6<br>(25.0-32.2) | 26.3<br>(23.2-29.4) | 22.6<br>(19.7-25.4) | 23.7<br>(20.3-27.1) | 25.6<br>(21.8-29.5) | 21.5<br>(19.3-23.8) | 23.5<br>(19.9-27.2) | <.001              |                                     |
| Income-to-poverty ratio 300-499%                                                         | 23.3<br>(18.4-28.3) | 19.2<br>(14.7-23.8) | 23.9<br>(20.5-27.4) | 23.2<br>(17.6-28.9) | 20.1<br>(15.9-24.2) | 19.2<br>(16.3-22.1) | 16.3<br>(12.0-20.6) | 15.9<br>(11.6-20.3) | 14.9<br>(11.4-18.4) | 12.3<br>(9.7-14.9)  | <.001              |                                     |
| Income-to-poverty ratio ≥500%                                                            | 12.7<br>(9.3-16.0)  | 16.3<br>(11.6-20.9) | 16.5<br>(12.4-20.7) | 15.3<br>(11.7-19.0) | 14.8<br>(11.7-18.0) | 11.0<br>(8.1-13.8)  | 8.9 (6.1-11.7)      | 11.1<br>(8.0-14.3)  | 9.8 (5.5-14.1)      | 6.6 (3.4-9.8)       | <.001              |                                     |
| P for group difference                                                                   | <.001               | <.001               | <.001               | <.001               | <.001               | <.001               | <.001               | <.001               | <.001               | <.001               | .003               |                                     |
| <b>10-year risk of atherosclerotic cardiovascular disease, mean (95% CI)<sup>c</sup></b> |                     |                     |                     |                     |                     |                     |                     |                     |                     |                     |                    |                                     |
| Income-to-poverty ratio ≤100%                                                            | 10.0<br>(8.5-11.4)  | 9.2 (8.6-9.9)       | 9.4 (8.0-10.8)      | 8.5 (7.1-9.9)       | 8.3 (7.5-9.0)       | 8.2 (7.4-8.9)       | 8.5 (7.4-9.5)       | 7.8 (7.3-8.3)       | 8.2 (7.3-9.2)       | 7.4 (6.8-8.0)       | <.001              |                                     |
| Income-to-poverty ratio >100-299%                                                        | 8.4 (7.8-9.1)       | 8.4 (7.6-9.2)       | 7.5 (6.9-8.1)       | 7.6 (6.9-8.3)       | 7.9 (7.5-8.3)       | 7.6 (7.3-8.0)       | 7.2 (6.5-7.9)       | 7.5 (6.9-8.0)       | 7.6 (6.9-8.3)       | 7.6 (7.0-8.3)       | .02                |                                     |
| Income-to-poverty ratio 300-499%                                                         | 6.5 (5.6-7.4)       | 6.7 (6.1-7.2)       | 6.0 (5.5-6.6)       | 6.6 (5.7-7.4)       | 6.5 (6.0-7.0)       | 6.7 (6.1-7.3)       | 5.9 (5.2-6.7)       | 6.1 (5.4-6.8)       | 5.7 (5.3-6.1)       | 5.9 (5.2-6.7)       | .06                |                                     |
| Income-to-poverty ratio ≥500%                                                            | 5.9 (5.1-6.8)       | 5.2 (4.8-5.7)       | 5.8 (4.7-6.9)       | 5.3 (4.7-5.8)       | 5.0 (4.4-5.6)       | 4.5 (4.2-4.9)       | 4.8 (4.2-5.4)       | 5.1 (4.5-5.8)       | 5.1 (4.6-5.7)       | 5.3 (4.9-5.8)       |                    | .009                                |
| P for group difference                                                                   | <.001               | <.001               | <.001               | <.001               | <.001               | <.001               | <.001               | <.001               | <.001               | <.001               |                    | .35                                 |

<sup>a</sup> Age- and sex-adjusted for the entire US population by the direct standardization method to the US 2000 Census population using the following age and sex categories: 20-39 male, 40-59 male, 60 years or older male, 20-39 female, 40-59 female, and 60 years or older female.

<sup>b</sup> Nonlinear trend was tested first by adding a quadratic term into the regression model. If not significant, linear trend was tested.

<sup>c</sup> The 10-year risk for atherosclerotic cardiovascular disease was estimated using the Pooled Cohort Equations.

**eTable 6. Age-Sex-Adjusted Prevalences (95% Confidence Intervals) of Elevated Cardiovascular Risk Factors Overall and by Race and Socioeconomic Status, NHANES 1999-2018<sup>a</sup>**

| Cardiovascular risk factors | 1999-2000           | 2001-2002           | 2003-2004           | 2005-2006           | 2007-2008           | 2009-2010           | 2011-2012           | 2013-2014           | 2015-2016           | 2017-2018           | P for linear trend | P for non-linear trend <sup>b</sup> |
|-----------------------------|---------------------|---------------------|---------------------|---------------------|---------------------|---------------------|---------------------|---------------------|---------------------|---------------------|--------------------|-------------------------------------|
| <b>Race/ethnicity</b>       |                     |                     |                     |                     |                     |                     |                     |                     |                     |                     |                    |                                     |
| <b>Obesity, %</b>           |                     |                     |                     |                     |                     |                     |                     |                     |                     |                     |                    |                                     |
| Non-Hispanic Asian          |                     |                     |                     |                     |                     |                     | 10.9<br>(7.9-13.9)  | 12.5<br>(9.4-15.6)  | 12.6<br>(10.2-15.0) | 17.6<br>(14.7-20.6) | .002               |                                     |
| Non-Hispanic Black          | 39.1<br>(35.7-42.4) | 37.8<br>(33.8-41.7) | 43.8<br>(39.1-48.4) | 45.4<br>(41.5-49.2) | 43.4<br>(39.1-47.7) | 48.5<br>(43.6-53.4) | 47.2<br>(43.6-50.7) | 48.0<br>(43.9-52.0) | 46.2<br>(41.4-51.0) | 49.1<br>(46.1-52.1) | <.001              |                                     |
| Hispanic                    | 31.5<br>(27.5-35.5) | 28.4<br>(23.4-33.4) | 34.8<br>(29.9-39.6) | 33.1<br>(29.8-36.3) | 38.5<br>(33.1-44.0) | 39.0<br>(35.2-42.9) | 42.6<br>(39.0-46.1) | 42.8<br>(38.2-47.3) | 47.2<br>(42.8-51.6) | 44.7<br>(41.5-48.0) | <.001              |                                     |
| Non-Hispanic White          | 28.3<br>(24.4-32.3) | 29.5<br>(26.7-32.3) | 30.3<br>(27.6-33.1) | 32.4<br>(28.9-35.8) | 32.2<br>(28.4-36.1) | 34.2<br>(31.7-36.6) | 32.6<br>(28.9-36.3) | 36.5<br>(34.1-39.0) | 38.0<br>(34.1-41.8) | 42.2<br>(36.7-47.6) | <.001              |                                     |
| P for group difference      | <.001               | .005                | <.001               | <.001               | <.001               | <.001               | <.001               | <.001               | <.001               | <.001               | <.001              |                                     |
| <b>Hypertension, %</b>      |                     |                     |                     |                     |                     |                     |                     |                     |                     |                     |                    |                                     |
| Non-Hispanic Asian          |                     |                     |                     |                     |                     |                     | 39.4<br>(35.0-43.8) | 37.2<br>(33.9-40.6) | 43.6<br>(39.4-47.7) | 47.9<br>(44.0-51.7) | <.001              |                                     |
| Non-Hispanic Black          | 58.1<br>(53.7-62.5) | 59.9<br>(56.4-63.4) | 54.6<br>(48.5-60.8) | 54.7<br>(51.8-57.5) | 52.5<br>(48.0-57.0) | 57.0<br>(53.8-60.2) | 56.9<br>(53.0-60.8) | 55.7<br>(53.5-57.8) | 55.1<br>(51.9-58.4) | 58.1<br>(54.7-61.5) |                    | .03                                 |
| Hispanic                    | 45.0<br>(40.6-49.5) | 39.2<br>(35.9-42.6) | 40.6<br>(35.4-45.7) | 38.7<br>(33.7-43.7) | 40.2<br>(37.1-43.3) | 39.5<br>(35.7-43.2) | 40.1<br>(36.5-43.7) | 40.1<br>(37.4-42.8) | 44.1<br>(41.5-46.7) | 44.6<br>(41.9-47.4) |                    | <.001                               |
| Non-Hispanic White          | 45.9<br>(41.5-50.2) | 45.0<br>(41.5-48.5) | 43.5<br>(39.9-47.1) | 43.4<br>(40.2-46.7) | 43.5<br>(40.4-46.6) | 41.4<br>(38.5-44.4) | 44.2<br>(41.6-46.7) | 41.5<br>(38.9-44.0) | 43.0<br>(40.1-46.0) | 44.8<br>(40.3-49.4) | .19                |                                     |
| P for group difference      | .002                | <.001               | <.001               | <.001               | .001                | <.001               | <.001               | <.001               | <.001               | <.001               |                    | .33                                 |

| Cardiovascular risk factors      | 1999-2000           | 2001-2002           | 2003-2004           | 2005-2006           | 2007-2008           | 2009-2010           | 2011-2012           | 2013-2014           | 2015-2016           | 2017-2018           | P for linear trend | P for non-linear trend <sup>b</sup> |
|----------------------------------|---------------------|---------------------|---------------------|---------------------|---------------------|---------------------|---------------------|---------------------|---------------------|---------------------|--------------------|-------------------------------------|
| <b>Diabetes, %</b>               |                     |                     |                     |                     |                     |                     |                     |                     |                     |                     |                    |                                     |
| Non-Hispanic Asian               |                     |                     |                     |                     |                     |                     | 14.8<br>(11.8-17.9) | 15.5<br>(12.7-18.3) | 13.9<br>(10.9-17.0) | 17.5<br>(14.8-20.3) | .29                |                                     |
| Non-Hispanic Black               | 14.0<br>(11.9-16.1) | 14.5<br>(12.0-16.9) | 13.0<br>(10.2-15.8) | 16.3<br>(13.7-18.8) | 19.8<br>(17.9-21.8) | 16.4<br>(14.8-17.9) | 19.0<br>(15.5-22.6) | 15.8<br>(14.0-17.5) | 17.6<br>(15.5-19.8) | 16.9<br>(14.7-19.2) |                    | .007                                |
| Hispanic                         | 11.4<br>(7.6-15.2)  | 12.2<br>(9.6-14.7)  | 14.9<br>(11.6-18.2) | 16.0<br>(12.3-19.7) | 14.9<br>(13.7-16.1) | 16.9<br>(14.2-19.6) | 16.7<br>(13.6-19.8) | 15.3<br>(13.6-16.9) | 18.3<br>(14.6-22.1) | 16.1<br>(14.2-18.0) | .006               |                                     |
| Non-Hispanic White               | 6.8 (5.2-8.4)       | 6.9 (5.8-8.0)       | 7.8 (6.5-9.1)       | 7.2 (6.1-8.4)       | 9.4 (7.2-11.7)      | 8.7 (7.3-10.1)      | 8.0 (6.9-9.2)       | 9.7 (8.2-11.1)      | 10.6<br>(8.7-12.5)  | 11.0<br>(9.1-12.9)  | <.001              |                                     |
| P for group difference           | <0.001              | <0.001              | <0.001              | <0.001              | <0.001              | <0.001              | <0.001              | <0.001              | <0.001              | <0.001              |                    | <.001                               |
| <b>High total cholesterol, %</b> |                     |                     |                     |                     |                     |                     |                     |                     |                     |                     |                    |                                     |
| Non-Hispanic Asian               |                     |                     |                     |                     |                     |                     | 25.2<br>(21.0-29.4) | 25.5<br>(21.0-30.1) | 24.6<br>(19.6-29.6) | 27.9<br>(24.3-31.6) | .41                |                                     |
| Non-Hispanic Black               | 21.0<br>(17.9-24.1) | 26.8<br>(20.0-33.7) | 25.8<br>(22.5-29.1) | 26.2<br>(22.2-30.2) | 28.4<br>(23.9-33.0) | 27.5<br>(23.1-32.0) | 25.5<br>(23.0-28.0) | 22.9<br>(19.8-25.9) | 24.0<br>(21.1-26.8) | 22.5<br>(20.1-24.9) |                    | .004                                |
| Hispanic                         | 23.9<br>(18.7-29.1) | 24.7<br>(22.3-27.0) | 30.3<br>(26.0-34.6) | 27.2<br>(20.7-33.7) | 30.3<br>(27.9-32.8) | 31.6<br>(28.6-34.7) | 26.7<br>(24.2-29.2) | 23.8<br>(21.7-25.9) | 24.5<br>(22.3-26.8) | 24.8<br>(21.8-27.9) |                    | .01                                 |
| Non-Hispanic White               | 26.5<br>(23.5-29.5) | 26.9<br>(24.2-29.6) | 29.9<br>(28.5-31.3) | 29.9<br>(26.5-33.3) | 30.6<br>(26.7-34.5) | 30.7<br>(28.1-33.3) | 28.4<br>(26.3-30.4) | 28.5<br>(26.1-30.9) | 27.3<br>(25.6-29.1) | 24.4<br>(22.1-26.7) |                    | <.001                               |
| P for group difference           | 0.04                | 0.23                | 0.03                | 0.27                | 0.66                | 0.30                | 0.16                | <0.001              | 0.06                | 0.08                |                    | .68                                 |

| Cardiovascular risk factors   | 1999-2000           | 2001-2002           | 2003-2004           | 2005-2006           | 2007-2008           | 2009-2010           | 2011-2012           | 2013-2014           | 2015-2016           | 2017-2018           | P for linear trend | P for non-linear trend <sup>b</sup> |
|-------------------------------|---------------------|---------------------|---------------------|---------------------|---------------------|---------------------|---------------------|---------------------|---------------------|---------------------|--------------------|-------------------------------------|
| <b>Educational Attainment</b> |                     |                     |                     |                     |                     |                     |                     |                     |                     |                     |                    |                                     |
| <b>Obesity, %</b>             |                     |                     |                     |                     |                     |                     |                     |                     |                     |                     |                    |                                     |
| <High school                  | 32.3<br>(27.4-37.2) | 31.9<br>(28.7-35.1) | 34.5<br>(30.1-38.9) | 36.3<br>(33.3-39.3) | 38.1<br>(33.1-43.2) | 36.9<br>(33.7-40.0) | 38.0<br>(35.1-40.9) | 41.0<br>(37.7-44.4) | 40.1<br>(35.8-44.5) | 40.8<br>(36.1-45.5) | <.001              |                                     |
| High school graduate          | 34.2<br>(30.7-37.8) | 31.3<br>(26.8-35.8) | 34.3<br>(30.4-38.3) | 39.0<br>(34.9-43.1) | 35.5<br>(31.6-39.4) | 38.1<br>(34.3-41.9) | 40.7<br>(35.5-46.0) | 41.8<br>(36.8-46.8) | 43.4<br>(38.1-48.7) | 47.0<br>(42.8-51.1) | <.001              |                                     |
| Some college                  | 30.0<br>(25.1-35.0) | 32.0<br>(27.4-36.7) | 33.1<br>(29.8-36.4) | 36.2<br>(32.2-40.1) | 37.2<br>(34.4-40.1) | 40.5<br>(38.1-42.8) | 37.8<br>(33.7-42.0) | 43.0<br>(39.8-46.3) | 45.9<br>(41.5-50.4) | 47.7<br>(43.5-51.9) | <.001              |                                     |
| ≥College graduate             | 21.4<br>(15.9-26.9) | 24.4<br>(21.5-27.3) | 26.1<br>(21.3-30.9) | 25.2<br>(21.0-29.4) | 24.7<br>(20.4-29.0) | 28.0<br>(23.6-32.4) | 27.6<br>(22.4-32.8) | 28.7<br>(25.7-31.6) | 30.9<br>(26.4-35.4) | 33.7<br>(27.3-40.1) | <.001              |                                     |
| P for group difference        | .001                | .002                | .04                 | <.001               | <.001               | <.001               | <.001               | <.001               | <.001               | <.001               | .90                |                                     |
| <b>Hypertension, %</b>        |                     |                     |                     |                     |                     |                     |                     |                     |                     |                     |                    |                                     |
| <High school                  | 48.9<br>(44.6-53.2) | 52.9<br>(50.0-55.8) | 47.6<br>(43.8-51.5) | 43.0<br>(38.6-47.4) | 46.9<br>(42.6-51.3) | 44.9<br>(40.3-49.4) | 46.7<br>(43.5-49.9) | 46.0<br>(42.7-49.4) | 47.0<br>(43.4-50.6) | 47.2<br>(41.7-52.6) | .09                |                                     |
| High school graduate          | 49.9<br>(44.7-55.2) | 48.4<br>(45.4-51.4) | 47.0<br>(42.4-51.5) | 47.6<br>(43.5-51.8) | 45.6<br>(42.2-49.0) | 46.2<br>(43.0-49.5) | 45.0<br>(41.4-48.7) | 47.8<br>(44.9-50.6) | 47.5<br>(43.8-51.1) | 48.2<br>(45.0-51.5) | .44                |                                     |
| Some college                  | 47.9<br>(43.0-52.8) | 44.6<br>(41.3-48.0) | 44.3<br>(40.2-48.4) | 44.7<br>(41.0-48.4) | 44.7<br>(41.6-47.8) | 44.9<br>(41.6-48.1) | 45.4<br>(42.4-48.3) | 46.2<br>(42.5-49.9) | 46.4<br>(41.9-51.0) | 52.3<br>(48.7-56.0) |                    | .004                                |
| ≥College graduate             | 41.0<br>(36.9-45.1) | 43.7<br>(38.0-49.4) | 40.1<br>(35.3-44.9) | 40.2<br>(35.6-44.7) | 39.2<br>(36.3-42.1) | 36.4<br>(31.8-41.0) | 42.3<br>(37.6-47.0) | 34.3<br>(31.7-37.0) | 39.4<br>(35.7-43.1) | 38.8<br>(33.3-44.3) | .08                |                                     |
| P for group difference        | <.001               | <.001               | .008                | .08                 | .007                | .001                | .16                 | <.001               | .001                | <.001               |                    | .34                                 |



| Cardiovascular risk factors      | 1999-2000           | 2001-2002           | 2003-2004           | 2005-2006           | 2007-2008           | 2009-2010           | 2011-2012           | 2013-2014           | 2015-2016           | 2017-2018           | P for linear trend | P for non-linear trend <sup>b</sup> |
|----------------------------------|---------------------|---------------------|---------------------|---------------------|---------------------|---------------------|---------------------|---------------------|---------------------|---------------------|--------------------|-------------------------------------|
| <b>Diabetes, %</b>               |                     |                     |                     |                     |                     |                     |                     |                     |                     |                     |                    |                                     |
| <High school                     | 11.9<br>(9.7-14.2)  | 13.8<br>(12.0-15.6) | 14.4<br>(12.4-16.5) | 13.5<br>(11.2-15.8) | 15.4<br>(13.4-17.4) | 14.7<br>(13.1-16.3) | 16.3<br>(12.8-19.7) | 15.7<br>(13.7-17.7) | 18.0<br>(15.5-20.5) | 18.0<br>(14.5-21.6) | <.001              |                                     |
| High school graduate             | 8.8 (6.7-11.0)      | 8.1 (6.2-10.0)      | 7.7 (6.7-8.8)       | 10.1<br>(7.6-12.7)  | 12.3<br>(9.3-15.3)  | 10.2<br>(7.7-12.7)  | 12.5<br>(9.7-15.3)  | 11.8<br>(10.0-13.6) | 12.7<br>(11.2-14.2) | 13.5<br>(10.3-16.7) | <.001              |                                     |
| Some college                     | 7.6 (4.2-11.1)      | 8.5 (6.4-10.7)      | 9.2 (7.3-11.1)      | 8.6 (6.3-10.9)      | 11.5<br>(9.5-13.5)  | 11.1<br>(9.3-12.9)  | 10.1<br>(8.2-11.9)  | 13.2<br>(11.0-15.5) | 13.3<br>(10.2-16.4) | 12.9<br>(11.3-14.6) | <.001              |                                     |
| ≥College graduate                | 2.7 (1.5-3.8)       | 5.2 (2.8-7.6)       | 7.4 (5.6-9.1)       | 5.8 (3.9-7.6)       | 6.1 (4.4-7.7)       | 7.6 (5.2-10.1)      | 7.1 (5.1-9.1)       | 6.3 (4.8-7.8)       | 9.3 (7.3-11.3)      | 9.9 (7.3-12.6)      | <.001              |                                     |
| P for group difference           | <.001               | <.001               | <.001               | <.001               | <.001               | <.001               | .001                | <.001               | .006                | .04                 | .04                |                                     |
| <b>High total cholesterol, %</b> |                     |                     |                     |                     |                     |                     |                     |                     |                     |                     |                    |                                     |
| <High school                     | 28.8<br>(25.2-32.4) | 30.6<br>(26.9-34.2) | 35.6<br>(30.3-40.9) | 28.6<br>(24.8-32.3) | 29.5<br>(25.7-33.2) | 34.0<br>(29.5-38.4) | 28.7<br>(25.6-31.9) | 26.1<br>(22.7-29.4) | 25.3<br>(21.8-28.7) | 24.9<br>(20.8-29.1) |                    | .002                                |
| High school graduate             | 32.9<br>(27.6-38.2) | 29.8<br>(25.7-33.9) | 32.9<br>(29.4-36.5) | 31.7<br>(27.9-35.4) | 34.0<br>(29.2-38.9) | 32.0<br>(27.6-36.5) | 28.6<br>(25.2-32.0) | 25.0<br>(21.8-28.2) | 28.4<br>(25.4-31.3) | 26.3<br>(23.2-29.4) | .002               |                                     |
| Some college                     | 21.6<br>(16.4-26.7) | 27.5<br>(24.0-31.0) | 30.2<br>(26.7-33.7) | 28.8<br>(24.4-33.1) | 31.8<br>(27.4-36.3) | 28.8<br>(25.6-32.0) | 28.5<br>(25.7-31.2) | 30.3<br>(27.4-33.2) | 26.0<br>(23.9-28.1) | 24.6<br>(21.4-27.8) |                    | <.001                               |
| ≥College graduate                | 21.6<br>(18.9-24.2) | 21.9<br>(18.7-25.1) | 24.7<br>(21.4-28.0) | 29.4<br>(24.0-34.9) | 26.8<br>(22.7-30.8) | 28.4<br>(23.9-32.9) | 25.5<br>(22.0-29.0) | 25.5<br>(21.8-29.2) | 26.6<br>(24.8-28.4) | 23.8<br>(20.4-27.2) |                    | .007                                |
| P for group difference           | <.001               | .02                 | <.001               | .29                 | .12                 | .16                 | .17                 | .04                 | .47                 | .71                 |                    | .001                                |

| Cardiovascular risk factors       | 1999-2000           | 2001-2002           | 2003-2004           | 2005-2006           | 2007-2008           | 2009-2010           | 2011-2012           | 2013-2014           | 2015-2016           | 2017-2018           | P for linear trend | P for non-linear trend <sup>b</sup> |
|-----------------------------------|---------------------|---------------------|---------------------|---------------------|---------------------|---------------------|---------------------|---------------------|---------------------|---------------------|--------------------|-------------------------------------|
| <b>Family Income</b>              |                     |                     |                     |                     |                     |                     |                     |                     |                     |                     |                    |                                     |
| <b>Obesity, %</b>                 |                     |                     |                     |                     |                     |                     |                     |                     |                     |                     |                    |                                     |
| Income-to-poverty ratio ≤100%     | 33.0<br>(28.9-37.2) | 31.9<br>(25.6-38.1) | 31.9<br>(28.6-35.2) | 35.2<br>(31.1-39.3) | 35.0<br>(30.9-39.0) | 37.1<br>(33.1-41.1) | 36.7<br>(32.6-40.9) | 39.9<br>(35.4-44.4) | 43.2<br>(38.1-48.2) | 43.9<br>(38.5-49.4) | <.001              |                                     |
| Income-to-poverty ratio >100-299% | 33.6<br>(28.9-38.3) | 32.1<br>(29.1-35.2) | 34.5<br>(30.1-38.9) | 37.5<br>(33.6-41.3) | 36.3<br>(33.3-39.4) | 37.4<br>(34.3-40.5) | 39.3<br>(35.3-43.3) | 44.5<br>(40.3-48.6) | 40.5<br>(35.3-45.8) | 45.4<br>(41.4-49.3) | <.001              |                                     |
| Income-to-poverty ratio 300-499%  | 29.9<br>(22.7-37.1) | 29.8<br>(25.4-34.2) | 32.4<br>(28.2-36.5) | 34.8<br>(29.5-40.2) | 34.5<br>(31.2-37.8) | 37.7<br>(32.9-42.5) | 35.7<br>(31.5-40.0) | 36.8<br>(33.4-40.3) | 43.7<br>(38.7-48.7) | 40.5<br>(33.9-47.1) | <.001              |                                     |
| Income-to-poverty ratio ≥500%     | 23.3<br>(17.1-29.5) | 24.0<br>(19.9-28.0) | 26.4<br>(21.6-31.3) | 27.6<br>(23.2-32.1) | 27.1<br>(23.1-31.1) | 30.4<br>(26.0-34.7) | 25.8<br>(21.1-30.4) | 29.5<br>(24.9-34.1) | 34.2<br>(29.1-39.3) | 40.0<br>(32.7-47.3) | <.001              |                                     |
| P for group difference            | .03                 | .005                | .03                 | <.001               | .05                 | .01                 | <.001               | .002                | .02                 | .43                 | .53                |                                     |
| <b>Hypertension, %</b>            |                     |                     |                     |                     |                     |                     |                     |                     |                     |                     |                    |                                     |
| Income-to-poverty ratio ≤100%     | 50.1<br>(44.6-55.6) | 49.8<br>(45.0-54.7) | 42.7<br>(38.3-47.1) | 42.3<br>(36.9-47.6) | 44.4<br>(40.9-48.0) | 45.5<br>(41.2-49.7) | 46.9<br>(44.2-49.5) | 46.9<br>(44.7-49.1) | 46.9<br>(43.1-50.7) | 47.4<br>(41.4-53.4) |                    | .02                                 |
| Income-to-poverty ratio >100-299% | 47.1<br>(41.3-52.8) | 49.0<br>(46.0-52.1) | 47.5<br>(42.8-52.2) | 45.2<br>(40.6-49.8) | 44.5<br>(41.9-47.1) | 46.1<br>(42.8-49.3) | 44.9<br>(41.9-47.9) | 47.6<br>(45.3-49.9) | 45.6<br>(42.5-48.7) | 49.6<br>(45.5-53.8) |                    | .05                                 |
| Income-to-poverty ratio 300-499%  | 47.7<br>(42.2-53.2) | 44.1<br>(40.5-47.8) | 45.0<br>(40.0-50.0) | 45.7<br>(42.1-49.2) | 44.5<br>(39.9-49.1) | 44.5<br>(40.8-48.3) | 45.3<br>(41.5-49.2) | 38.9<br>(34.4-43.4) | 42.9<br>(37.6-48.3) | 47.2<br>(39.6-54.7) | .27                |                                     |
| Income-to-poverty ratio ≥500%     | 46.6<br>(42.5-50.7) | 43.9<br>(39.2-48.6) | 43.7<br>(36.8-50.5) | 43.6<br>(38.6-48.7) | 42.8<br>(40.6-45.0) | 36.3<br>(31.4-41.2) | 43.0<br>(37.4-48.6) | 38.7<br>(35.5-41.8) | 42.5<br>(38.3-46.7) | 41.6<br>(36.7-46.5) | .16                |                                     |
| P for group difference            | .22                 | .009                | .32                 | .54                 | .54                 | .01                 | .26                 | .001                | .17                 | .08                 |                    | .11                                 |

| Cardiovascular risk factors       | 1999-2000           | 2001-2002           | 2003-2004           | 2005-2006           | 2007-2008           | 2009-2010           | 2011-2012           | 2013-2014           | 2015-2016           | 2017-2018           | P for linear trend | P for non-linear trend <sup>b</sup> |
|-----------------------------------|---------------------|---------------------|---------------------|---------------------|---------------------|---------------------|---------------------|---------------------|---------------------|---------------------|--------------------|-------------------------------------|
| <b>Diabetes %</b>                 |                     |                     |                     |                     |                     |                     |                     |                     |                     |                     |                    |                                     |
| Income-to-poverty ratio ≤100%     | 13.1<br>(9.9-16.3)  | 12.7<br>(9.0-16.3)  | 13.1<br>(10.9-15.3) | 14.3<br>(11.2-17.5) | 15.1<br>(12.9-17.3) | 13.3<br>(10.4-16.2) | 18.5<br>(15.5-21.5) | 17.0<br>(14.2-19.7) | 19.6<br>(16.8-22.3) | 15.5<br>(12.2-18.9) | <.001              |                                     |
| Income-to-poverty ratio >100-299% | 10.3<br>(8.2-12.5)  | 10.1<br>(8.6-11.7)  | 10.6<br>(8.8-12.4)  | 10.9<br>(9.5-12.4)  | 13.1<br>(11.1-15.1) | 12.6<br>(10.2-15.1) | 12.3<br>(9.5-15.1)  | 12.6<br>(10.5-14.8) | 13.4<br>(10.9-16.0) | 14.9<br>(12.9-16.9) | <.001              |                                     |
| Income-to-poverty ratio 300-499%  | 6.7 (3.6-9.8)       | 7.8 (5.9-9.6)       | 7.5 (6.3-8.6)       | 7.2 (4.8-9.6)       | 11.3<br>(9.0-13.6)  | 10.3<br>(8.7-12.0)  | 10.7<br>(7.5-13.9)  | 11.7<br>(9.8-13.7)  | 13.3<br>(10.2-16.4) | 9.7 (7.0-12.3)      | <.001              |                                     |
| Income-to-poverty ratio ≥500%     | 3.8 (2.0-5.6)       | 4.8 (3.1-6.5)       | 7.6 (5.6-9.6)       | 5.6 (4.3-7.0)       | 6.6 (4.8-8.4)       | 7.3 (5.3-9.2)       | 5.1 (3.4-6.7)       | 6.8 (4.2-9.3)       | 8.0 (5.1-10.8)      | 12.3<br>(9.1-15.5)  | <.001              |                                     |
| P for group difference            | <.001               | .001                | <.001               | <.001               | <.001               | <.001               | <.001               | <.001               | <.001               | .009                | .07                |                                     |
| <b>High total cholesterol, %</b>  |                     |                     |                     |                     |                     |                     |                     |                     |                     |                     |                    |                                     |
| Income-to-poverty ratio ≤100%     | 29.7<br>(21.4-37.9) | 27.9<br>(21.6-34.3) | 34.8<br>(29.6-40.0) | 28.8<br>(24.3-33.2) | 33.5<br>(28.3-38.6) | 29.5<br>(23.8-35.1) | 31.2<br>(26.5-35.9) | 25.8<br>(22.4-29.1) | 25.0<br>(21.1-29.0) | 23.5<br>(19.5-27.6) |                    | .03                                 |
| Income-to-poverty ratio >100-299% | 27.7<br>(23.9-31.4) | 29.2<br>(24.8-33.5) | 31.4<br>(27.4-35.4) | 29.6<br>(26.3-33.0) | 29.1<br>(26.3-31.9) | 33.9<br>(30.4-37.3) | 26.3<br>(23.4-29.2) | 26.3<br>(23.9-28.7) | 27.0<br>(24.8-29.2) | 24.7<br>(22.3-27.0) |                    | .001                                |
| Income-to-poverty ratio 300-499%  | 25.4<br>(21.6-29.1) | 25.7<br>(22.2-29.3) | 27.1<br>(22.8-31.4) | 26.9<br>(23.1-30.6) | 31.4<br>(27.6-35.1) | 27.9<br>(23.3-32.5) | 27.8<br>(25.0-30.5) | 27.9<br>(23.6-32.3) | 26.6<br>(22.2-31.0) | 24.5<br>(19.9-29.0) |                    | .04                                 |
| Income-to-poverty ratio ≥500%     | 20.4<br>(16.4-24.4) | 24.1<br>(20.9-27.3) | 28.1<br>(23.2-33.0) | 30.1<br>(24.5-35.7) | 29.6<br>(24.2-34.9) | 28.2<br>(24.2-32.2) | 27.5<br>(23.6-31.4) | 28.4<br>(25.3-31.6) | 28.5<br>(25.8-31.2) | 26.3<br>(20.3-32.2) |                    | .01                                 |
| P-values for group difference     | .09                 | .16                 | .10                 | .54                 | .25                 | .21                 | .26                 | .55                 | .39                 | .92                 |                    | .001                                |

<sup>a</sup> Age- and sex-adjusted for the entire US population by the direct standardization method to the US 2000 Census population using the following age and sex categories: 20-39 male, 40-59 male, 60 years or older male, 20-39 female, 40-59 female, and 60 years or older female.

<sup>b</sup> Nonlinear trend was tested first by adding a quadratic term into the regression model. If not significant, linear trend was tested.

**eTable 7. Racial and Ethnic Differences in Proportion of Elevated Cardiovascular Risk Factors Adjusting for Social Determinants of Health During 1999-2008 and 2009-2018 <sup>a</sup>**

| Cardiovascular risk factors and race/ethnicity     | NHANES 1999-2008    |                                 |                                                     | NHANES 2009-2018    |                                 |                                                     |
|----------------------------------------------------|---------------------|---------------------------------|-----------------------------------------------------|---------------------|---------------------------------|-----------------------------------------------------|
|                                                    | No. of participants | Age and sex-adjusted difference | Age, sex, and SDOH-adjusted difference <sup>a</sup> | No. of participants | Age and sex-adjusted difference | Age, sex, and SDOH-adjusted difference <sup>b</sup> |
| Obesity, %                                         |                     |                                 |                                                     |                     |                                 |                                                     |
| Blacks - Whites                                    | 4253/10407          | 11.8 (9.8, 13.7)                | 11.1 (9.1, 13.1)                                    | 5124/9826           | 11.4 (8.8, 13.9)                | 10.0 (7.6, 12.4)                                    |
| Hispanics - White                                  | 5280/10407          | 3.0 (0.0, 5.9)                  | 3.4 (0.5, 6.4)                                      | 5677/9826           | 7.6 (5.4, 9.7)                  | 7.9 (5.6, 10.2)                                     |
| Hypertension, %                                    |                     |                                 |                                                     |                     |                                 |                                                     |
| Blacks - Whites                                    | 3516/9100           | 11.8 (9.1, 14.5)                | 10.7 (7.9, 13.5)                                    | 4831/9409           | 15.2 (13.3, 17.1)               | 13.1 (11.2, 14.9)                                   |
| Hispanics - White                                  | 4585/9100           | -2.7 (-5.2, -0.2)               | -3.4 (-6.2, -0.7)                                   | 5375/9409           | 0.0 (-1.8, 1.8)                 | -1.5 (-3.2, 0.3)                                    |
| Diabetes, %                                        |                     |                                 |                                                     |                     |                                 |                                                     |
| Blacks - Whites                                    | 3998/10294          | 7.8 (6.6, 9.1)                  | 6.1 (4.9, 7.4)                                      | 4809/9666           | 8.5 (7.2, 9.7)                  | 6.4 (5.0, 7.8)                                      |
| Hispanics - White                                  | 5211/10294          | 5.6 (4.2, 6.9)                  | 4.1 (2.7, 5.5)                                      | 5535/9666           | 7.2 (5.6, 8.8)                  | 5.4 (3.8, 7.1)                                      |
| High total cholesterol, %                          |                     |                                 |                                                     |                     |                                 |                                                     |
| Blacks - Whites                                    | 2630/7880           | -2.4 (-4.9, 0.0)                | -3.5 (-5.9, -1.0)                                   | 4426/8917           | -2.6 (-4.3, -0.9)               | -3.0 (-4.7, -1.4)                                   |
| Hispanics - White                                  | 2904/7880           | -1.4 (-3.7, 0.9)                | -2.6 (-4.9, -0.4)                                   | 4940/8917           | -0.8 (-2.5, 0.8)                | -0.8 (-2.6, 1.0)                                    |
| Self-reported history of cardiovascular disease, % |                     |                                 |                                                     |                     |                                 |                                                     |
| Blacks - Whites                                    | 4369/10582          | 1.7 (0.8, 2.7)                  | -0.9 (-1.8, 0.1)                                    | 5169/9906           | 2.1 (1.2, 3.0)                  | -0.6 (-1.5, 0.3)                                    |
| Hispanics - White                                  | 5372/10582          | -1.3 (-2.1, -0.6)               | -3.8 (-4.8, -2.9)                                   | 5691/9906           | -0.6 (-1.4, 0.2)                | -2.9 (-3.8, -2.1)                                   |

<sup>a</sup> Racial and ethnic differences in proportion of elevated cardiovascular risk factors were defined as proportions in Black participants minus proportions in White participants or proportions in Hispanic participants minus proportions in White participants. NHANES participants with complete data for the cardiovascular risk factor were included in this analysis.

<sup>b</sup> Social determinants of health (SDOH) included education (<high school, high school graduate, some college, or ≥college graduate), family income-to-poverty ratio, home ownership, employment (employed, student, retired, or unemployed), health insurance (private, government, or none), and access to regular healthcare facility.
